# Supplementary material for: Synthesis of a novel twisted π-conjugated macrocycle via double Friedel–Crafts reaction and its physical properties
Source: Royal Society of Chemistry journal article supplement (doi:10.1039/d4cc00890a), 2024-01-01
Supplement: d4cc00890a1.pdf [file d4cc00890a1.pdf]

## Supplementary Information

### Synthesis of Novel Twisted $\pi$ -Conjugated Macrocycle via Double Friedel-Crafts Reaction and Its Physical Properties

Zhiyan Jiang<sup>b</sup> and Yoichiro Kuninobu<sup>\*a,b</sup>

<sup>a</sup>*Institute for Materials Chemistry and Engineering, Kyushu University, 6-1 Kasugakoen,  
Kasuga-Shi, Fukuoka 816-8580, Japan.*

<sup>b</sup>*Department of Interdisciplinary Engineering Sciences, Interdisciplinary Graduate School of  
Engineering Sciences, Kyushu University, 6-1 Kasugakoen, Kasuga-Shi, Fukuoka 816-8580,  
Japan.*

*E-mail: kuninobu@cm.kyushu-u.ac.jp*

## Contents

|                                                                                                                                                                          |           |
|--------------------------------------------------------------------------------------------------------------------------------------------------------------------------|-----------|
| <b>1. General</b> .....                                                                                                                                                  | <b>S4</b> |
| <b>2. Synthesis and Characterization of Substrates</b> .....                                                                                                             | <b>S5</b> |
| <b>Scheme S1.</b> Synthesis of twisted macrocycle <b>3</b> .....                                                                                                         | S5        |
| Tetrakis(triphenylphosphine)palladium(0) (Pd(PPh <sub>3</sub> ) <sub>4</sub> ) .....                                                                                     | S5        |
| 3,3'-(Ethyne-1,2-diyl)bis( <i>N,N</i> -dimethylaniline) ( <b>1</b> ) .....                                                                                               | S5        |
| Twisted macrocycle ( <b>3</b> ) .....                                                                                                                                    | S6        |
| 3-Bromo- <i>N,N</i> -dimethylaniline ( <b>S1</b> ) .....                                                                                                                 | S6        |
| <i>N,N</i> -Dimethyl-3-((trimethylsilyl)ethynyl)aniline ( <b>S2</b> ) .....                                                                                              | S7        |
| 3-Ethynyl- <i>N,N</i> -dimethylaniline ( <b>S3</b> ) .....                                                                                                               | S7        |
| <b>3. Crystal Data of Twisted Macrocycle</b> .....                                                                                                                       | <b>S8</b> |
| <b>Figure S1.</b> Assignment of the axial chirality of (a) ( <i>R<sub>a</sub>,R<sub>a</sub></i> )- <b>3</b> ; (b) ( <i>S<sub>a</sub>,S<sub>a</sub></i> )- <b>3</b> ..... | S8        |
| <b>Figure S2.</b> Single crystal X-ray structure of twisted macrocycle <b>3</b> in a unit cell .....                                                                     | S9        |
| <b>Figure S3.</b> ORTEP drawings of ( <i>R<sub>a</sub>,R<sub>a</sub></i> )- <b>3</b> .....                                                                               | S9        |
| <b>Figure S4.</b> ORTEP drawings of ( <i>S<sub>a</sub>,S<sub>a</sub></i> )- <b>3</b> .....                                                                               | S10       |
| <b>Table S1.</b> Crystal data and structure refinement for <b>3</b> (CCDC2335048) .....                                                                                  | S11       |
| <b>Table S2.</b> Fractional atomic coordinates ( $\times 10^4$ ) and equivalent isotropic displacement<br>parameters ( $\text{\AA}^2 \times 10^3$ ) for <b>3</b> .....   | S12       |
| <b>Table S3.</b> Anisotropic displacement parameters ( $\times 10^4$ ) for <b>3</b> .....                                                                                | S14       |

|                                                                                                                                                                                      |            |
|--------------------------------------------------------------------------------------------------------------------------------------------------------------------------------------|------------|
| Table S4. Bond lengths for <b>3</b> .....                                                                                                                                            | S16        |
| Table S5. Bond angles for <b>3</b> .....                                                                                                                                             | S17        |
| Table S6. Torsion angles for <b>3</b> .....                                                                                                                                          | S19        |
| Table S7. Hydrogen atom coordinates ( $\times 10^4$ ) and isotropic displacement parameters ( $\text{\AA}^2 \times 10^3$ ) for <b>3</b> .....                                        | S21        |
| Table S8. Solvent masks information for <b>3</b> .....                                                                                                                               | S22        |
| <b>Thermogravimetric Analysis (TGA) of Product 3 in Crystal</b> .....                                                                                                                | S22        |
| Table S9. Experimental details of TGA. ....                                                                                                                                          | S22        |
| Figure S5. Thermogravimetric analysis (TGA) curves of crystal of <b>3</b> .....                                                                                                      | S23        |
| <b>4. Photophysical Properties</b> .....                                                                                                                                             | <b>S24</b> |
| Figure S6. UV/Vis spectrum and fluorescence spectrum of <b>1</b> and <b>3</b> . ....                                                                                                 | S24        |
| Table S10. Photophysical properties of <b>1</b> and <b>3</b> .....                                                                                                                   | S24        |
| <b>5. Theroretical Calculations</b> .....                                                                                                                                            | <b>S25</b> |
| <b>5.1 Geometry Optimizations</b> .....                                                                                                                                              | <b>S25</b> |
| Table S11. Atomic coordinates of optimized structure of <b>1</b> by DFT, B3LYP/6-31G(d).S25                                                                                          | S25        |
| Table S12. Calculation details of diarylalkyne <b>1</b> by DFT, B3LYP/6-31G(d). ....                                                                                                 | S26        |
| Table S13. Atomic coordinates of optimized structure of <b>3</b> by DFT, B3LYP/6-31G(d).<br>.....                                                                                    | S28        |
| Table S14. Calculation details of <b>3</b> by DFT, B3LYP/6-31G(d). ....                                                                                                              | S30        |
| Figure S7. Molecular orbitals of ( <i>R</i> <sub>a</sub> , <i>R</i> <sub>a</sub> )- <b>3</b> with the energy levels (Isovalue = 0.02). ....                                          | S32        |
| <b>5.2 Energy Barrier for the Interconversion of Two Enantiomers</b> .....                                                                                                           | <b>S33</b> |
| Table S15. Atomic coordinates of ( <i>R</i> <sub>a</sub> , <i>R</i> <sub>a</sub> )- <b>3</b> .....                                                                                   | S33        |
| Table S16. Calculation details of ( <i>R</i> <sub>a</sub> , <i>R</i> <sub>a</sub> )- <b>3</b> . ....                                                                                 | S35        |
| Table S17. Atomic coordinates of TS- <b>3</b> . ....                                                                                                                                 | S37        |
| Table S18. Calculation details of TS- <b>3</b> .....                                                                                                                                 | S39        |
| Table S19. Atomic coordinates of ( <i>S</i> <sub>a</sub> , <i>S</i> <sub>a</sub> )- <b>3</b> .....                                                                                   | S41        |
| Table S20. Calculation details of ( <i>S</i> <sub>a</sub> , <i>S</i> <sub>a</sub> )- <b>3</b> . ....                                                                                 | S43        |
| <b>5.3 TD-DFT Calculations: Stimulated UV-Vis Spectra, Molecular Orbitals and Electronic Transitions</b> .....                                                                       | <b>S45</b> |
| Figure S8. Optimized structure of <b>1</b> . (a) Top view, (b) Front view, and (c) Space fill model (Top view). ....                                                                 | S45        |
| Table S21. Atomic coordinate of optimized structure of <b>1</b> by TD-DFT, B3LYP/6-311++G(d,p). ....                                                                                 | S45        |
| Table S22. Calculation details of <b>1</b> by TD-DFT, B3LYP/6-311++G(d,p). ....                                                                                                      | S46        |
| Figure S9. Optimized structure of ( <i>R</i> <sub>a</sub> , <i>R</i> <sub>a</sub> )- <b>3</b> . (a) Top view, (b) Front view (c) Side view and (d) Space fill model (Top view). .... | S47        |
| Table S23. Atomic coordinates and calculation details of optimized structure of <b>3</b> by TD-DFT, B3LYP/6-311++G(d,p). ....                                                        | S47        |

|                                                                                                                                                   |            |
|---------------------------------------------------------------------------------------------------------------------------------------------------|------------|
| <b>Table S24.</b> Calculation details of optimized structure of <b>3</b> by TD-DFT, B3LYP/6-311++G(d,p).....                                      | S50        |
| <b>Figure S10.</b> Simulated UV-Vis spectrum of <b>1</b> by TD-DFT calculation.....                                                               | S51        |
| <b>Table S25.</b> Selected electronic transitions for <b>1</b> . ....                                                                             | S51        |
| <b>Figure S11.</b> Simulated UV-Vis spectrum of ( <i>R<sub>a</sub>,R<sub>a</sub></i> )- <b>3</b> by TD-DFT calculation. ....                      | S55        |
| <b>Table S26.</b> Selected electronic transitions for ( <i>R<sub>a</sub>,R<sub>a</sub></i> )- <b>3</b> . ....                                     | S55        |
| <b>6. NMR Spectra</b> .....                                                                                                                       | <b>S60</b> |
| <b>Figure S12.</b> <sup>1</sup> H NMR (CDCl <sub>3</sub> , 400 MHz): 3,3'-(Ethyne-1,2-diyl)bis( <i>N,N</i> -dimethylaniline) ( <b>1</b> ). ....   | S60        |
| <b>Figure S13.</b> <sup>13</sup> C NMR (CDCl <sub>3</sub> , 100 MHz): 3,3'-(Ethyne-1,2-diyl)bis( <i>N,N</i> -dimethylaniline) ( <b>1</b> ). ....  | S60        |
| <b>Figure S14.</b> <sup>1</sup> H NMR (CDCl <sub>3</sub> , 400 MHz): Twisted macrocycle <b>3</b> . ....                                           | S61        |
| <b>Figure S15.</b> <sup>13</sup> C NMR (CDCl <sub>3</sub> , 100 MHz): Twisted macrocycle <b>3</b> . ....                                          | S61        |
| <b>Figure S16.</b> <sup>1</sup> H NMR (CDCl <sub>3</sub> , 400 MHz): 3-Bromo- <i>N,N</i> -dimethylaniline ( <b>S1</b> ). ....                     | S62        |
| <b>Figure S17.</b> <sup>13</sup> C NMR (CDCl <sub>3</sub> , 100 MHz): 3-Bromo- <i>N,N</i> -dimethylaniline ( <b>S1</b> ). ....                    | S62        |
| <b>Figure S18.</b> <sup>1</sup> H NMR (CDCl <sub>3</sub> , 400 MHz): <i>N,N</i> -Dimethyl-3-((trimethylsilyl)ethynyl)aniline ( <b>S2</b> ). ....  | S63        |
| <b>Figure S19.</b> <sup>13</sup> C NMR (CDCl <sub>3</sub> , 100 MHz): <i>N,N</i> -Dimethyl-3-((trimethylsilyl)ethynyl)aniline ( <b>S2</b> ). .... | S63        |
| <b>Figure S20.</b> <sup>1</sup> H NMR (CDCl <sub>3</sub> , 400 MHz): 3-Ethynyl- <i>N,N</i> -dimethylaniline ( <b>S3</b> ). ....                   | S64        |
| <b>Figure S21.</b> <sup>13</sup> C NMR (CDCl <sub>3</sub> , 100 MHz): 3-Ethynyl- <i>N,N</i> -dimethylaniline ( <b>S3</b> ). ....                  | S64        |
| <b>7. Circular Dichroism Spectra</b> .....                                                                                                        | <b>S65</b> |
| <b>Figure S22.</b> Experimental CD spectra about comparison between mixture and chiral additives (CSA) in dichloromethane. ....                   | S65        |
| <b>8. References</b> .....                                                                                                                        | <b>S66</b> |

## 1. General

All reactions were carried out using standard Schlenk techniques under an inert atmosphere. All reagents were purchased from commercial sources and used without further purification unless otherwise noted. Column chromatography was performed on silica gel 60N (Kanto Chemical CO., Inc., spherical neutral, particle size 63-210  $\mu\text{m}$ ).

NMR spectra were recorded on JEOL ECZ-400 (400 MHz for  $^1\text{H}$  NMR, 100 MHz for  $^{13}\text{C}$  NMR) and JEOL JNM-ECA600 (600 MHz for  $^1\text{H}$  NMR, 150 MHz for  $^{13}\text{C}$  NMR). Proton and carbon chemical shifts are reported relative to the residual solvent ( $\text{CDCl}_3$  ( $\delta$  7.26 for  $^1\text{H}$  NMR or  $\delta$  77.16 for  $^{13}\text{C}$  NMR),  $\text{CD}_2\text{Cl}_2$  ( $\delta$  5.32 for  $^1\text{H}$  NMR or  $\delta$  53.84 for  $^{13}\text{C}$  NMR), acetone- $d_6$  ( $\delta$  2.05 for  $^1\text{H}$  NMR or  $\delta$  29.84, 206.26 for  $^{13}\text{C}$  NMR)) used as an internal reference. UV-vis absorption spectra were recorded on a V650 spectrophotometer (JASCO). Emission spectra were recorded on C9920-02 (Hamamatsu Photonics). HRMS were measured on a JEOL JMS-700 spectrometer.

## 2. Synthesis and Characterization of Substrates

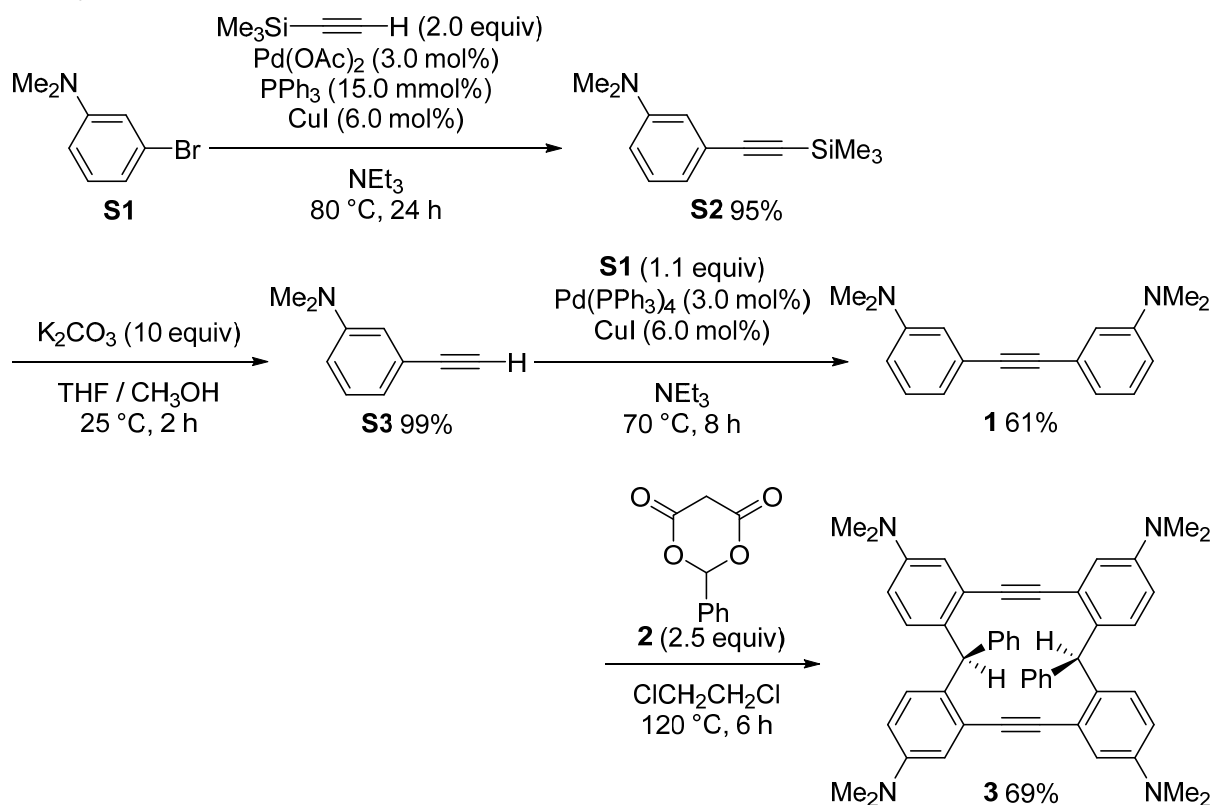

**Scheme S1.** Synthesis of twisted macrocycle **3**.

### Tetrakis(triphenylphosphine)palladium(0) ( $\text{Pd}(\text{PPh}_3)_4$ )

$\text{Pd}(\text{PPh}_3)_4$  was prepared by the modified procedure of the reported method<sup>1</sup>. To a flame-dried 50 mL two-neck round bottom flask with a condenser and a magnetic stirrer were added  $\text{PdCl}_2$  (0.500 g, 2.82 mmol, 1.0 equiv) and triphenylphosphine ( $\text{PPh}_3$ , 3.70 g, 14.1 mmol, 5.0 equiv) followed by the addition of degassed DMSO (33 mL). The mixture was heated at  $140\text{ }^\circ\text{C}$ . After the solid was completely dissolved, an orange solution was obtained. Then, the heat was turned off and the mixture was kept stirring rapidly for 1 min. Hydrazine hydrate ( $\text{N}_2\text{H}_4 \cdot \text{H}_2\text{O}$ , 0.56 mL) was added over 1 min via syringe. The reaction was cooled to room temperature after the addition of hydrazine hydrate, and yellow solid was precipitated. The solid was washed with ethanol ( $2 \times 15\text{ mL}$ ) and ether ( $2 \times 15\text{ mL}$ ) to give  $\text{Pd}(\text{PPh}_3)_4$  (2.97 g, 2.57 mmol, 91%) as a golden yellow solid. The prepared catalyst was stored under  $\text{N}_2$  at  $-15\text{ }^\circ\text{C}$  and could be used without further purification.

### 3,3'-(Ethyne-1,2-diyl)bis(*N,N*-dimethylaniline) (**1**)

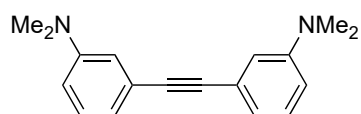

3-Bromo-*N,N*-dimethylaniline (**S3**, 2.00 g, 10.0 mmol, 1.0 equiv) and 3-ethynyl-*N,N*-dimethylaniline (**S1**, 0.870 g, 6.60 mmol, 1.1 equiv) were added in a 100 mL two-neck round bottle flask under  $\text{N}_2$  atmosphere, followed by the addition of  $\text{Pd}(\text{PPh}_3)_4$  (347 mg, 0.300 mmol, 5.0 mol%) and  $\text{CuI}$  (114 mg, 0.600 mmol, 6.0 mol%).  $\text{NEt}_3$  (30 mL, dehydrated by MS4A and and

degassed by N<sub>2</sub> bubbling) was added into the flask by syringe. After stirring at 70 °C for 8 h, the reaction mixture was concentrated by evaporation and the residue was filtered through Celite with CH<sub>2</sub>Cl<sub>2</sub> as an eluent. The mixture was purified by column chromatography on silica gel (hexane/EtOAc = 20/1 as the eluent, *R<sub>f</sub>* = 0.15) to give 3,3'-(ethyne-1,2-diyl)bis(*N,N*-dimethylaniline) (**1**) as a yellow solid (0.96 g, 3.65 mmol, 61%).

<sup>1</sup>H NMR (400 MHz, CDCl<sub>3</sub>): δ 7.21 (dd, *J* = 8.1, 8.1 Hz, 2H), 6.94-6.88 (m, 4H), 6.75-6.68 (m, 2H), 2.97 (s, 12H); <sup>13</sup>C NMR (100 MHz, CDCl<sub>3</sub>): δ 150.5, 129.1, 124.0, 120.2, 115.6, 112.9, 89.4, 40.7; HRMS (EI<sup>+</sup>) Calcd for C<sub>18</sub>H<sub>20</sub>N<sub>2</sub> ([M]<sup>+</sup>) 264.1626, Found 264.1626.

### Twisted macrocycle (**3**)

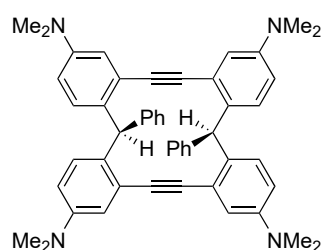

A 20 mL reaction tube equipped with a screw cap and a magnetic stirrer bar was charged with nitrogen gas. 3,3'-(Ethyne-1,2-diyl)bis(*N,N*-dimethylaniline) (**1**, 423 mg, 1.60 mmol, 1.0 equiv), 2-phenyl-1,3-dioxane-4,6-dione (**2**, 769 mg, 4.00 mmol, 2.5 equiv), which was synthesized via the reported method,<sup>2</sup> and dehydrated 1,2-dichloroethane (8.0 mL) were added under nitrogen atmosphere.

The mixture was stirred at 120 °C for 6 h. After the reaction completed, the reaction mixture was concentrated in vacuo. The mixture was purified by column chromatography on silica gel (Hexane/CH<sub>2</sub>Cl<sub>2</sub>/EtOAc/NEt<sub>3</sub> = 10:1:1:0.1 as the eluent, *R<sub>f</sub>* = 0.17) to give **3** as a brown solid (387 mg, 0.549 mmol, 69%).

<sup>1</sup>H NMR (400 MHz, CDCl<sub>3</sub>): δ 7.23 (dd, *J* = 7.4, 7.4 Hz, 4H), 7.14 (t, *J* = 7.5, 2H), 7.09 (s, 2H), 7.06 (d, *J* = 5.7 Hz, 4H), 6.90 (d, *J* = 8.7 Hz, 4H), 6.85 (d, *J* = 2.8 Hz, 4H), 6.63 (dd, *J* = 8.7, 2.8 Hz, 4H), 2.89 (s, 24H); <sup>13</sup>C NMR (100 MHz, CDCl<sub>3</sub>): δ 148.6, 144.9, 133.8, 130.1, 129.4, 128.2, 125.8, 124.2, 116.2, 112.9, 91.6, 50.5, 40.7; HRMS (FAB<sup>+</sup>) Calcd for C<sub>50</sub>H<sub>48</sub>N<sub>4</sub> ([M]<sup>+</sup>) 704.3879, Found 704.3879.

### 3-Bromo-*N,N*-dimethylaniline (**S1**)

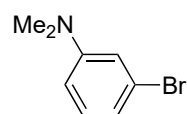

3-Bromo-*N,N*-dimethylaniline (**S1**) was synthesized according to the reported method<sup>2</sup>: A mixture of 3-bromoaniline (8.60 g, 50.0 mmol, 1.0 equiv), iodomethane (15.6 g, 110 mmol, 2.2 equiv), and K<sub>2</sub>CO<sub>3</sub> (15.2 g, 110 mmol, 2.2 equiv) in dehydrated DMF (100 mL) was stirred at 75 °C for 24 h. After completion of the reaction monitored by TLC, the reaction mixture was filtered to remove the residual solid. The reaction mixture was poured into saturated NaHCO<sub>3</sub> aqueous solution and the mixture was extracted with ethyl acetate (3 x 50 mL). The combined organic layer was washed with brine, dried over Na<sub>2</sub>SO<sub>4</sub>, filtered, and concentrated in vacuo. The mixture was purified by column chromatography on silica gel (hexane, *R<sub>f</sub>* = 0.13) to give 3-bromo-*N,N*-dimethylaniline (**S1**) as a pale yellow oil (9.50 g, 47.5 mmol, 95%).

<sup>1</sup>H NMR (400 MHz, CDCl<sub>3</sub>): δ 7.07 (dd, *J* = 7.9, 7.9 Hz, 1H), 6.85-6.79 (m, 2H), 6.62 (ddd, *J* = 8.4, 2.5, 1.0 Hz, 1H), 2.94 (s, 6H); <sup>13</sup>C NMR (100 MHz, CDCl<sub>3</sub>): δ 151.8, 130.4, 123.5,

119.2, 115.2, 111.0, 40.5. The analytical data is in accordance with the previous report<sup>2</sup>.

### ***N,N*-Dimethyl-3-((trimethylsilyl)ethynyl)aniline (S2)**

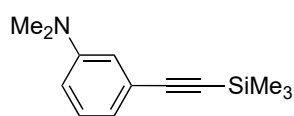

*N,N*-Dimethyl-3-((trimethylsilyl)ethynyl)aniline (**S2**) was synthesized by the modified procedure of the reported method<sup>3</sup>: 3-Bromo-*N,N*-dimethylaniline (**S1**, 2.00 g, 10.0 mmol, 1.0 equiv) was added into a 200 mL two-neck round bottle flask under N<sub>2</sub> atmosphere, followed by the addition of Pd(OAc)<sub>2</sub> (67.4 mg, 0.300 mmol, 3.0 mol%), PPh<sub>3</sub> (393 mg, 0.150 mmol, 15.0 mol%) and CuI (114 mg, 0.600 mmol, 6.0 mol%). NEt<sub>3</sub> (100 mL, dehydrated by MS4A and degassed by N<sub>2</sub> bubbling) was added into the flask by syringe, followed by the slow addition of trimethylsilylacetylene (1.96 g, 20.0 mmol, 2.0 equiv). After stirring at 80 °C for 24 h, the reaction mixture was concentrated by evaporation and the residue was filtered through Celite with CH<sub>2</sub>Cl<sub>2</sub> as the eluent. The mixture was purified by column chromatography on silica gel (using hexane to remove possible residual aniline **S1** followed by using hexane/CH<sub>2</sub>Cl<sub>2</sub> = 2/1 as the eluent, *R<sub>f</sub>* = 0.50) to give *N,N*-dimethyl-3-((trimethylsilyl)ethynyl)aniline (**S2**) as a pale yellow oil (2.07 g, 9.52 mmol, 95%).

<sup>1</sup>H NMR (400 MHz, CDCl<sub>3</sub>): δ 7.15 (dd, *J* = 8.0, 8.0 Hz, 1H), 6.88-6.78 (m, 2H), 6.70 (dd, *J* = 8.4, 2.5 Hz, 1H), 2.94 (s, 6H), 0.25 (s, 9H); <sup>13</sup>C NMR (100 MHz, CDCl<sub>3</sub>): δ 150.4, 129.0, 123.6, 120.5, 115.8, 113.2, 106.3, 92.8, 40.6, 0.2; HRMS (EI<sup>+</sup>) Calcd for C<sub>13</sub>H<sub>19</sub>NSi ([M]<sup>+</sup>) 217.1287, Found 127.1287.

### **3-Ethynyl-*N,N*-dimethylaniline (S3)**

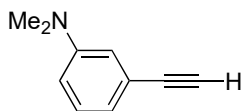

3-Ethynyl-*N,N*-dimethylaniline (**S3**) was synthesized by the reported method<sup>4</sup>: *N,N*-Dimethyl-3-((trimethylsilyl)ethynyl)aniline (**S2**, 5.78 g, 26.6 mmol, 1.0 equiv), K<sub>2</sub>CO<sub>3</sub> (36.8 g, 266 mmol, 10 equiv) were added into a 500 mL three-neck round bottom flask followed by the addition of tetrahydrofuran (90 mL) and CH<sub>3</sub>OH (90 mL) as a solvent. The mixture was stirred at 25 °C for 2 h. The reaction mixture was concentrated by evaporation and poured into water and extracted with CH<sub>2</sub>Cl<sub>2</sub> (3 x 30 mL). The organic layer was washed with saturated brine and dried with MgSO<sub>4</sub>. MgSO<sub>4</sub> was filtered and the organic layer was concentrated in vacuo. The crude mixture was purified by column chromatography on silica gel (hexane/CH<sub>2</sub>Cl<sub>2</sub> = 3/1 as the eluent, *R<sub>f</sub>* = 0.20) to give 3-ethynyl-*N,N*-dimethylaniline (**S3**) as a pale yellow solid (3.82 g, 26.3 mmol, 99%).

<sup>1</sup>H NMR (400 MHz, CDCl<sub>3</sub>): δ 7.23-7.13 (m, 1H), 6.90-6.81 (m, 2H), 6.78-6.68 (m, 1H), 3.03 (s, 1H), 2.95 (s, 6H); <sup>13</sup>C NMR (100 MHz, CDCl<sub>3</sub>): δ 150.4, 129.1, 122.6, 120.4, 116.0, 113.4, 84.8, 76.1, 40.6; HRMS (EI<sup>+</sup>) Calcd for C<sub>10</sub>H<sub>11</sub>N ([M]<sup>+</sup>) 145.0891, Found 145.0890.

### 3. Crystal Data of Twisted Macrocycle

**Experimental.** Single colourless prism-shaped crystals of compound **3** were obtained by recrystallisation from toluene/hexane. A suitable crystal  $0.25 \times 0.17 \times 0.15 \text{ mm}^3$  was selected and mounted on a suitable support on an XtaLAB Synergy R, DW system, HyPix diffractometer. The crystal was kept at a steady  $T = 100.00(10) \text{ K}$  during data collection. The structure was solved with the ShelXT<sup>5</sup> structure solution program using the Intrinsic Phasing solution method and by using Olex2<sup>6</sup> as the graphical interface. The model was refined with version 2018/3 of ShelXL 2018/3<sup>7</sup> using Least Squares minimisation.

Each configuration of enantiomers was named as  $(R_a, R_a)$ -**3** (Figure S1a) and  $(S_a, S_a)$ -**3** (Figure S1b) according to the definition of axial chirality.<sup>8</sup> The two “near” substituents NMe<sub>2</sub> and methine groups on the chiral axial diarylalkyne are ranked as *a* and *b*, respectively. The two “far” substituents NMe<sub>2</sub> and methine groups are ranked as *c* and *d*, respectively (priority:  $a > b > c > d$ ). If the direction from *b* to *c* is clockwise, the axial chirality of diarylalkyne is  $R_a$ . On the contrary, if the direction from *b* to *c* is anti-clockwise, the axial chirality of diarylalkyne is  $S_a$ .

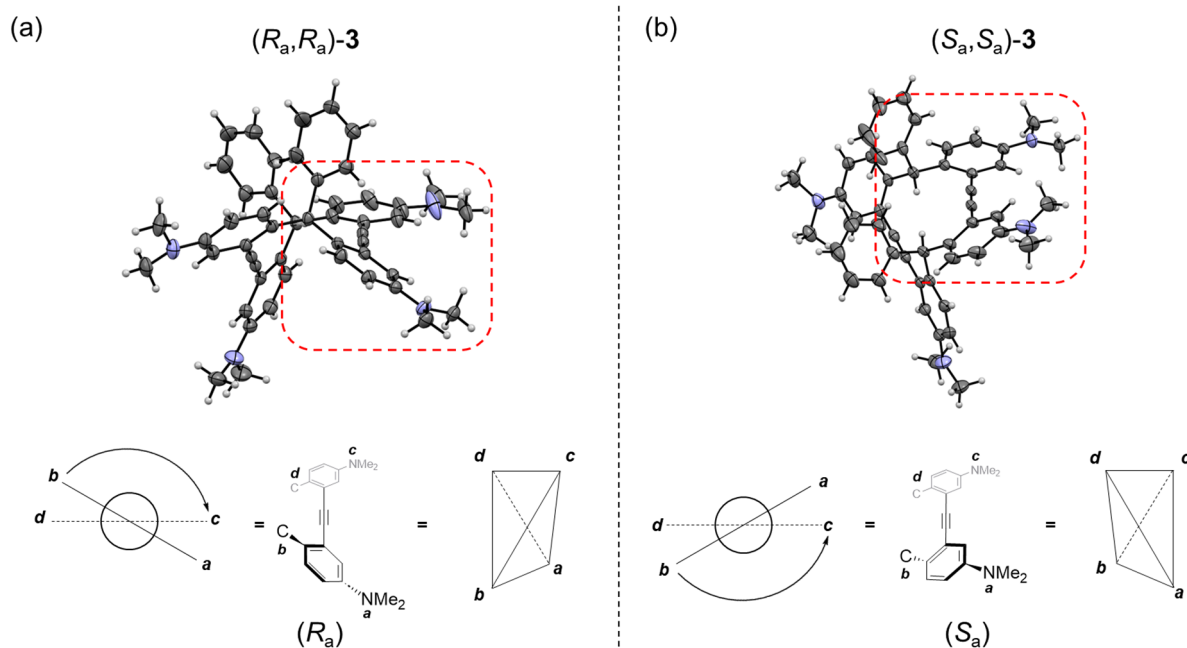

**Figure S1.** Assignment of the axial chirality of (a)  $(R_a, R_a)$ -**3**; (b)  $(S_a, S_a)$ -**3**.



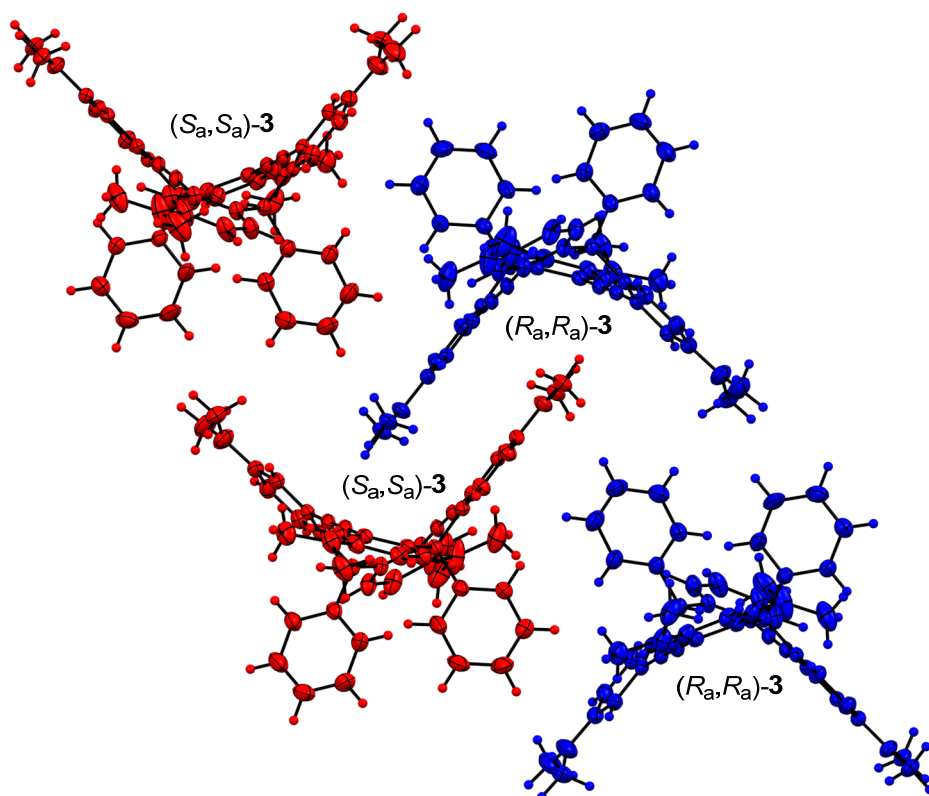

**Figure S2.** Single crystal X-ray structure of twisted macrocycle **3** in a unit cell.

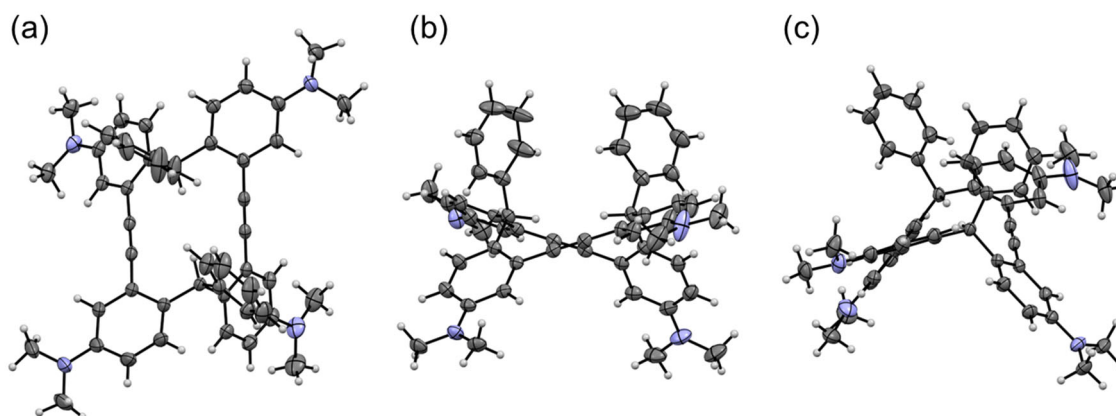

**Figure S3.** ORTEP drawings of  $(R_a, R_a)$ -**3**: (a) top view, (b) front view, and (c) side view. Thermal ellipsoids are drawn at 50% probability level.

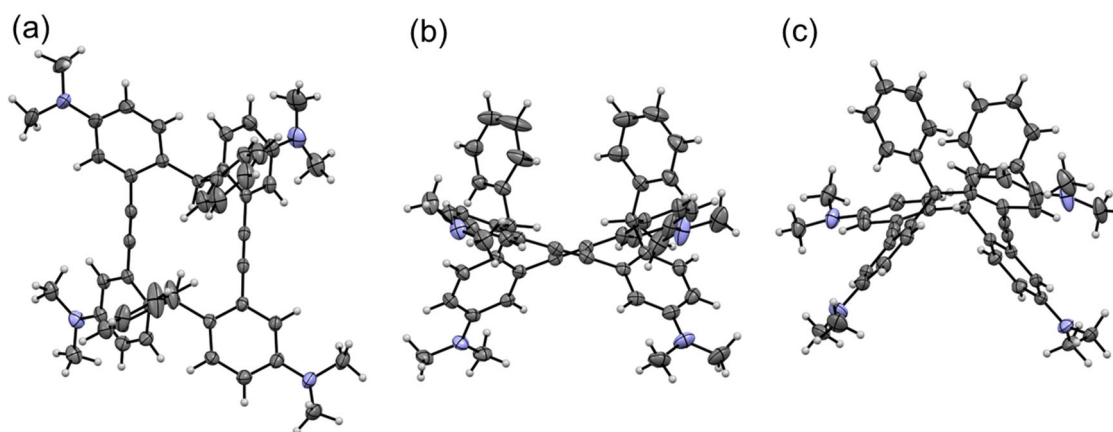

**Figure S4.** ORTEP drawings of (S<sub>a</sub>,S<sub>a</sub>)-**3**: (a) top view, (b) front view, and (c) side view. Thermal ellipsoids are drawn at 50% probability level.

**Table S1.** Crystal data and structure refinement for **3** (CCDC2335048)

| <b>Identification code</b>                                   | <b>molecule_3</b>                                                                  |
|--------------------------------------------------------------|------------------------------------------------------------------------------------|
| Empirical formula                                            | C <sub>64</sub> H <sub>64</sub> N <sub>4</sub>                                     |
| Moiety formula                                               | C <sub>50</sub> H <sub>48</sub> N <sub>4</sub> , 2[C <sub>7</sub> H <sub>8</sub> ] |
| Formula weight                                               | 889.19                                                                             |
| Temperature/K                                                | 100.00(10)                                                                         |
| Crystal system                                               | monoclinic                                                                         |
| Space group                                                  | <i>P</i> 2 <sub>1</sub> / <i>n</i>                                                 |
| <i>a</i> /Å                                                  | 12.6774(4)                                                                         |
| <i>b</i> /Å                                                  | 23.2733(8)                                                                         |
| <i>c</i> /Å                                                  | 17.2556(5)                                                                         |
| $\alpha$ /°                                                  | 90                                                                                 |
| $\beta$ /°                                                   | 92.162(3)                                                                          |
| $\gamma$ /°                                                  | 90                                                                                 |
| Volume/Å <sup>3</sup>                                        | 5087.6(3)                                                                          |
| <i>Z</i>                                                     | 4                                                                                  |
| $\rho_{\text{calc}}$ /cm <sup>3</sup>                        | 1.161                                                                              |
| $\mu$ /mm <sup>-1</sup>                                      | 0.510                                                                              |
| F(000)                                                       | 1904.0                                                                             |
| Crystal size/mm <sup>3</sup>                                 | 0.248 × 0.168 × 0.148                                                              |
| Radiation                                                    | Cu <i>K</i> <sub>α</sub> ( $\lambda$ = 1.54184)                                    |
| 2 $\theta$ range for data collection/°                       | 6.38 to 151.132                                                                    |
| Index ranges                                                 | -9 ≤ <i>h</i> ≤ 15, -28 ≤ <i>k</i> ≤ 28, -21 ≤ <i>l</i> ≤ 21                       |
| Reflections collected                                        | 36578                                                                              |
| Independent reflections                                      | 10141 [ <i>R</i> <sub>int</sub> = 0.0322, <i>R</i> <sub>sigma</sub> = 0.0313]      |
| Data/restraints/parameters                                   | 10141/0/495                                                                        |
| Goodness-of-fit on F <sup>2</sup>                            | 1.070                                                                              |
| Final <i>R</i> indexes [ <i>I</i> ≥ 2 $\sigma$ ( <i>I</i> )] | <i>R</i> <sub>1</sub> = 0.0609, <i>wR</i> <sub>2</sub> = 0.1909                    |
| Final <i>R</i> indexes [all data]                            | <i>R</i> <sub>1</sub> = 0.0667, <i>wR</i> <sub>2</sub> = 0.1965                    |
| Largest diff. peak/hole / e Å <sup>-3</sup>                  | 0.33/-0.29                                                                         |

**Table S2.** Fractional atomic coordinates ( $\times 10^4$ ) and equivalent isotropic displacement parameters ( $\text{\AA}^2 \times 10^3$ ) for **3**.  $U_{eq}$  is defined as 1/3 of the trace of the orthogonalised  $U_{ij}$ .

| Atom | x          | y          | z          | $U_{eq}$ |
|------|------------|------------|------------|----------|
| N46  | 3554.4(13) | 4993.5(7)  | 4013.6(9)  | 38.3(4)  |
| N49  | 1818.1(13) | 3295.8(8)  | 8981.6(9)  | 43.4(4)  |
| C24  | 5134.2(13) | 3454.7(7)  | 7660.6(9)  | 28.2(3)  |
| C23  | 6067.6(13) | 3545.6(7)  | 7707.0(9)  | 27.6(3)  |
| C25  | 4024.4(13) | 3331.8(7)  | 7615.5(9)  | 27.8(3)  |
| C22  | 7169.1(13) | 3688.8(7)  | 7763.8(9)  | 27.5(3)  |
| C2   | 3979.2(13) | 3629.1(7)  | 5627.6(9)  | 26.8(3)  |
| C9   | 6707.1(13) | 3361.7(7)  | 5319.4(9)  | 28.8(3)  |
| C16  | 7586.1(13) | 2895.4(7)  | 6794.7(9)  | 27.5(3)  |
| C8   | 5835.4(13) | 3562.9(7)  | 5255.9(9)  | 27.6(3)  |
| C17  | 7913.3(13) | 3398.9(7)  | 7319.0(9)  | 27.5(3)  |
| C5   | 3696.9(14) | 4553.5(7)  | 4541.9(10) | 31.3(4)  |
| C7   | 4811.2(13) | 3820.7(7)  | 5175.9(9)  | 26.8(3)  |
| C30  | 3526.0(13) | 3157.9(7)  | 6913.8(9)  | 27.4(3)  |
| N52  | 8838.2(16) | 4749.9(8)  | 8859.0(11) | 52.1(5)  |
| C1   | 4140.2(13) | 3117.8(7)  | 6171.8(9)  | 27.6(3)  |
| C6   | 4670.9(13) | 4274.1(7)  | 4647.6(9)  | 28.7(3)  |
| C15  | 8181.8(13) | 2878.8(8)  | 6044.6(9)  | 30.8(4)  |
| C29  | 2465.5(14) | 3009.6(8)  | 6936.2(10) | 31.8(4)  |
| C10  | 7744.5(13) | 3117.9(8)  | 5354.5(9)  | 30.7(4)  |
| C26  | 3461.4(14) | 3370.0(8)  | 8301.6(10) | 32.6(4)  |
| C31  | 3953.5(14) | 2539.6(7)  | 5774.0(10) | 32.2(4)  |
| C21  | 7479.3(15) | 4141.9(8)  | 8260.4(10) | 33.6(4)  |
| C37  | 7653.9(14) | 2313.6(8)  | 7201.2(10) | 33.4(4)  |
| C3   | 3021.5(14) | 3911.9(8)  | 5519.4(10) | 32.9(4)  |
| C27  | 2388.9(14) | 3236.9(8)  | 8312.1(10) | 34.6(4)  |
| C4   | 2872.1(14) | 4361.7(8)  | 4997.3(11) | 34.7(4)  |
| C28  | 1901.5(14) | 3046.1(8)  | 7608.4(11) | 35.5(4)  |
| C20  | 8532.0(16) | 4316.5(8)  | 8339.9(11) | 37.7(4)  |
| N43  | 9907.6(14) | 2938.0(13) | 3989.5(11) | 69.4(7)  |
| C18  | 8949.7(14) | 3587.7(8)  | 7397.7(10) | 34.3(4)  |
| C19  | 9262.9(15) | 4029.9(8)  | 7893.0(11) | 38.3(4)  |
| C11  | 8315.1(15) | 3123.3(9)  | 4671.1(10) | 39.0(4)  |
| C36  | 3463.4(15) | 2470.5(8)  | 5051.3(11) | 36.6(4)  |
| C48  | 2536.4(17) | 5267.4(8)  | 3916.0(12) | 41.5(4)  |
| C47  | 4378.7(17) | 5130.2(8)  | 3484.6(11) | 40.5(4)  |
| C14  | 9178.3(14) | 2632.9(9)  | 6006.1(11) | 38.8(4)  |
| C12  | 9337.4(15) | 2900.7(11) | 4650.4(11) | 47.5(5)  |
| C13  | 9751.5(15) | 2642.0(11) | 5333.9(12) | 46.7(5)  |
| C42  | 8340.0(16) | 2198.8(9)  | 7827.1(11) | 41.0(4)  |
| C35  | 3304.5(17) | 1930.0(9)  | 4731.2(12) | 44.1(5)  |

| <b>Atom</b> | <b>x</b>    | <b>y</b>   | <b>z</b>   | <b><i>U<sub>eq</sub></i></b> |
|-------------|-------------|------------|------------|------------------------------|
| C38         | 7007(2)     | 1868.6(9)  | 6919.6(12) | 47.3(5)                      |
| C51         | 2390.6(18)  | 3445.9(11) | 9704.2(11) | 47.8(5)                      |
| C50         | 902.6(17)   | 2924.0(12) | 9067.7(13) | 51.5(6)                      |
| C34         | 3640(2)     | 1447.6(9)  | 5122.1(13) | 57.4(6)                      |
| C41         | 8396(2)     | 1651.5(10) | 8156.0(13) | 52.3(5)                      |
| C54         | 8038(2)     | 5087.4(9)  | 9227.7(14) | 55.1(6)                      |
| C45         | 9434.3(19)  | 3163.7(13) | 3282.8(12) | 61.3(7)                      |
| C40         | 7758(2)     | 1218.6(10) | 7873.9(14) | 60.6(7)                      |
| C44         | 10971.0(18) | 2723.0(14) | 3996.7(15) | 65.1(7)                      |
| C39         | 7052(2)     | 1327.0(10) | 7254.2(14) | 61.0(7)                      |
| C53         | 9908(2)     | 4942.6(11) | 8880.0(16) | 63.0(7)                      |
| C32         | 4305(3)     | 2052.0(10) | 6159.0(12) | 62.8(7)                      |
| C33         | 4154(3)     | 1512.0(10) | 5839.7(14) | 84.5(11)                     |

**Table S3.** Anisotropic displacement parameters ( $\times 10^4$ ) for **3**. The anisotropic displacement factor exponent takes the form:  $-2\pi^2[h^2a^{*2} \times U_{11} + \dots + 2hka^* \times b^* \times U_{12}]$ .

| Atom | $U_{11}$ | $U_{22}$ | $U_{33}$ | $U_{23}$  | $U_{13}$ | $U_{12}$ |
|------|----------|----------|----------|-----------|----------|----------|
| N46  | 44.4(9)  | 31.5(8)  | 38.6(8)  | 11.1(6)   | -3.5(7)  | 1.7(6)   |
| N49  | 39.4(9)  | 59.2(11) | 32.2(8)  | 6.0(7)    | 10.7(7)  | 5.6(8)   |
| C24  | 36.0(9)  | 29.0(8)  | 19.8(7)  | -0.7(6)   | 2.2(6)   | 4.8(6)   |
| C23  | 34.7(9)  | 28.1(8)  | 20.1(7)  | 0.5(6)    | 2.4(6)   | 4.2(6)   |
| C25  | 31.7(8)  | 27.2(8)  | 24.7(8)  | 2.6(6)    | 2.9(6)   | 4.0(6)   |
| C22  | 33.9(8)  | 27.4(8)  | 21.2(7)  | 4.4(6)    | -0.9(6)  | 1.5(6)   |
| C2   | 32.8(8)  | 25.5(8)  | 21.9(7)  | -0.2(6)   | -1.4(6)  | 2.1(6)   |
| C9   | 33.2(9)  | 33.7(8)  | 19.4(7)  | 2.5(6)    | -1.2(6)  | -3.0(7)  |
| C16  | 27.0(8)  | 33.4(8)  | 21.8(7)  | 0.0(6)    | -1.7(6)  | 4.1(6)   |
| C8   | 32.9(9)  | 30.6(8)  | 19.2(7)  | 1.7(6)    | -1.2(6)  | -3.0(6)  |
| C17  | 30.7(8)  | 30.2(8)  | 21.3(7)  | 3.7(6)    | -2.0(6)  | 3.1(6)   |
| C5   | 41.0(9)  | 25.6(8)  | 26.8(8)  | 0.7(6)    | -5.8(7)  | 0.5(7)   |
| C7   | 31.2(8)  | 26.7(8)  | 22.2(7)  | -1.7(6)   | -3.7(6)  | -0.7(6)  |
| C30  | 31.9(8)  | 25.1(7)  | 25.1(8)  | 4.3(6)    | 1.5(6)   | 5.1(6)   |
| N52  | 64.0(12) | 42.7(10) | 49.4(10) | -11.5(8)  | -2.7(9)  | -15.8(8) |
| C1   | 30.4(8)  | 29.8(8)  | 22.4(7)  | 3.0(6)    | 0.1(6)   | 5.0(6)   |
| C6   | 35.2(8)  | 27.2(8)  | 23.3(7)  | 0.8(6)    | -2.6(6)  | -4.2(6)  |
| C15  | 28.6(8)  | 39.2(9)  | 24.4(8)  | -3.9(7)   | -0.8(6)  | 2.3(7)   |
| C29  | 30.9(8)  | 34.2(9)  | 30.0(8)  | 2.6(7)    | -1.5(6)  | 4.1(7)   |
| C10  | 27.8(8)  | 40.3(9)  | 24.1(8)  | -2.5(7)   | -0.2(6)  | -1.5(7)  |
| C26  | 35.8(9)  | 37.0(9)  | 25.2(8)  | 0.4(7)    | 2.6(7)   | 3.4(7)   |
| C31  | 40.7(9)  | 30.5(9)  | 25.8(8)  | 2.0(6)    | 5.5(7)   | 5.8(7)   |
| C21  | 43.9(10) | 30.2(8)  | 26.5(8)  | 1.1(7)    | 0.5(7)   | -0.1(7)  |
| C37  | 39.2(9)  | 35.4(9)  | 25.7(8)  | -1.3(7)   | 1.5(7)   | 7.6(7)   |
| C3   | 32.9(9)  | 34.0(9)  | 32.1(9)  | 6.0(7)    | 4.6(7)   | 6.0(7)   |
| C27  | 35.9(9)  | 38.9(9)  | 29.5(9)  | 5.7(7)    | 7.0(7)   | 7.8(7)   |
| C4   | 35.8(9)  | 33.6(9)  | 34.7(9)  | 4.1(7)    | 0.1(7)   | 8.4(7)   |
| C28  | 31.0(9)  | 40.3(10) | 35.4(9)  | 5.7(7)    | 2.6(7)   | 2.4(7)   |
| C20  | 50.1(11) | 31.9(9)  | 30.6(9)  | 2.2(7)    | -4.9(8)  | -7.2(8)  |
| N43  | 33.8(9)  | 142(2)   | 33.3(9)  | -20.3(11) | 9.3(7)   | -9.3(11) |
| C18  | 32.8(9)  | 40.4(10) | 29.5(8)  | 3.8(7)    | -1.8(7)  | 2.0(7)   |
| C19  | 36.6(9)  | 42.2(10) | 35.7(9)  | 4.7(8)    | -5.6(7)  | -8.7(8)  |
| C11  | 33.3(9)  | 60.6(12) | 23.1(8)  | -2.8(8)   | 0.4(7)   | -5.7(8)  |
| C36  | 41.3(10) | 32.5(9)  | 35.4(9)  | 2.3(7)    | -5.7(7)  | 2.9(7)   |
| C48  | 51.0(11) | 32.5(9)  | 40.2(10) | 10.0(8)   | -6.2(8)  | 7.8(8)   |
| C47  | 55.4(11) | 32.5(9)  | 33.4(9)  | 9.6(7)    | -1.9(8)  | -3.3(8)  |
| C14  | 30.1(9)  | 53.7(11) | 32.3(9)  | -8.4(8)   | -2.6(7)  | 8.6(8)   |
| C12  | 29.9(9)  | 82.3(16) | 30.7(9)  | -18.0(10) | 4.4(7)   | -8.9(9)  |
| C13  | 28.0(9)  | 72.0(14) | 40.2(10) | -18.2(10) | 1.6(7)   | 6.5(9)   |
| C42  | 45.0(10) | 42.2(10) | 35.1(9)  | 4.1(8)    | -6.2(8)  | 7.8(8)   |
| C35  | 52.3(12) | 41.9(11) | 37.9(10) | -5.8(8)   | -1.5(8)  | -1.5(9)  |

| <b>Atom</b> | $U_{11}$  | $U_{22}$ | $U_{33}$ | $U_{23}$  | $U_{13}$  | $U_{12}$  |
|-------------|-----------|----------|----------|-----------|-----------|-----------|
| C38         | 68.6(14)  | 39.4(10) | 33.0(10) | -2.4(8)   | -9.0(9)   | -3.2(10)  |
| C51         | 51.8(12)  | 61.4(13) | 31.2(10) | -0.2(9)   | 14.7(8)   | 6.5(10)   |
| C50         | 38.8(10)  | 75.0(16) | 41.4(11) | 19.4(10)  | 11.3(8)   | 3.8(10)   |
| C34         | 102.8(19) | 30.2(10) | 39.9(11) | -4.8(8)   | 14.4(11)  | 0.4(11)   |
| C41         | 66.2(14)  | 47.8(12) | 42.4(11) | 9.5(9)    | -6.0(10)  | 15.2(10)  |
| C54         | 80.7(16)  | 34.5(10) | 49.3(12) | -9.4(9)   | -10.4(11) | -0.2(10)  |
| C45         | 54.7(13)  | 99(2)    | 31.7(10) | -14.8(11) | 16.1(9)   | -22.5(13) |
| C40         | 102(2)    | 33.5(11) | 46.6(12) | 4.9(9)    | -0.4(12)  | 12.9(12)  |
| C44         | 40.9(12)  | 99(2)    | 56.4(14) | -31.1(14) | 21.8(10)  | -9.4(12)  |
| C39         | 99(2)     | 36.8(11) | 46.3(12) | -3.1(9)   | -7.8(12)  | -9.5(12)  |
| C53         | 72.3(16)  | 55.1(14) | 60.7(15) | -9.1(11)  | -9.5(12)  | -28.3(12) |
| C32         | 119(2)    | 39.5(11) | 28.5(10) | -0.3(8)   | -12.4(11) | 25.1(13)  |
| C33         | 181(4)    | 31.6(11) | 39.9(13) | 2.9(9)    | -8.0(16)  | 30.0(16)  |

**Table S4.** Bond lengths for **3**.

| <b>Atom</b> | <b>Atom</b> | <b>Length/Å</b> | <b>Atom</b> | <b>Atom</b> | <b>Length/Å</b> |
|-------------|-------------|-----------------|-------------|-------------|-----------------|
| N46         | C5          | 1.378(2)        | N52         | C53         | 1.427(3)        |
| N46         | C48         | 1.444(2)        | C1          | C31         | 1.525(2)        |
| N46         | C47         | 1.449(3)        | C15         | C10         | 1.409(2)        |
| N49         | C27         | 1.393(2)        | C15         | C14         | 1.391(2)        |
| N49         | C51         | 1.461(3)        | C29         | C28         | 1.388(3)        |
| N49         | C50         | 1.460(3)        | C10         | C11         | 1.407(2)        |
| C24         | C23         | 1.202(2)        | C26         | C27         | 1.395(3)        |
| C24         | C25         | 1.435(2)        | C31         | C36         | 1.381(3)        |
| C23         | C22         | 1.435(2)        | C31         | C32         | 1.380(3)        |
| C25         | C30         | 1.404(2)        | C21         | C20         | 1.397(3)        |
| C25         | C26         | 1.408(2)        | C37         | C42         | 1.387(3)        |
| C22         | C17         | 1.410(2)        | C37         | C38         | 1.397(3)        |
| C22         | C21         | 1.406(2)        | C3          | C4          | 1.389(2)        |
| C2          | C7          | 1.407(2)        | C27         | C28         | 1.413(3)        |
| C2          | C1          | 1.525(2)        | C20         | C19         | 1.397(3)        |
| C2          | C3          | 1.388(2)        | N43         | C12         | 1.376(3)        |
| C9          | C8          | 1.201(2)        | N43         | C45         | 1.438(3)        |
| C9          | C10         | 1.432(2)        | N43         | C44         | 1.438(3)        |
| C16         | C17         | 1.528(2)        | C18         | C19         | 1.386(3)        |
| C16         | C15         | 1.523(2)        | C11         | C12         | 1.397(3)        |
| C16         | C37         | 1.526(2)        | C36         | C35         | 1.386(3)        |
| C8          | C7          | 1.432(2)        | C14         | C13         | 1.392(3)        |
| C17         | C18         | 1.387(2)        | C12         | C13         | 1.408(3)        |
| C5          | C6          | 1.401(2)        | C42         | C41         | 1.395(3)        |
| C5          | C4          | 1.404(3)        | C35         | C34         | 1.369(3)        |
| C7          | C6          | 1.402(2)        | C38         | C39         | 1.387(3)        |
| C30         | C1          | 1.526(2)        | C34         | C33         | 1.386(4)        |
| C30         | C29         | 1.390(2)        | C41         | C40         | 1.370(4)        |
| N52         | C20         | 1.394(2)        | C40         | C39         | 1.391(4)        |
| N52         | C54         | 1.449(3)        | C32         | C33         | 1.383(3)        |



**Table S5.** Bond angles for **3**.

| Atom | Atom | Atom | Angle/°    | Atom | Atom | Atom | Angle/°    |
|------|------|------|------------|------|------|------|------------|
| C5   | N46  | C48  | 119.97(16) | C14  | C15  | C10  | 116.82(16) |
| C5   | N46  | C47  | 120.02(16) | C28  | C29  | C30  | 122.51(16) |
| C48  | N46  | C47  | 119.50(15) | C15  | C10  | C9   | 121.59(15) |
| C27  | N49  | C51  | 118.32(16) | C11  | C10  | C9   | 117.50(15) |
| C27  | N49  | C50  | 117.78(18) | C11  | C10  | C15  | 120.91(16) |
| C50  | N49  | C51  | 115.22(16) | C27  | C26  | C25  | 121.47(16) |
| C23  | C24  | C25  | 178.48(18) | C36  | C31  | C1   | 124.47(15) |
| C24  | C23  | C22  | 176.71(17) | C32  | C31  | C1   | 117.84(16) |
| C30  | C25  | C24  | 120.84(14) | C32  | C31  | C36  | 117.70(18) |
| C30  | C25  | C26  | 121.15(16) | C20  | C21  | C22  | 121.49(17) |
| C26  | C25  | C24  | 117.97(15) | C42  | C37  | C16  | 123.48(17) |
| C17  | C22  | C23  | 121.39(15) | C42  | C37  | C38  | 118.09(18) |
| C21  | C22  | C23  | 117.71(15) | C38  | C37  | C16  | 118.41(16) |
| C21  | C22  | C17  | 120.87(16) | C2   | C3   | C4   | 122.82(16) |
| C7   | C2   | C1   | 120.17(14) | N49  | C27  | C26  | 121.73(17) |
| C3   | C2   | C7   | 116.45(15) | N49  | C27  | C28  | 121.30(17) |
| C3   | C2   | C1   | 123.31(15) | C26  | C27  | C28  | 116.96(16) |
| C8   | C9   | C10  | 177.18(17) | C3   | C4   | C5   | 121.07(16) |
| C15  | C16  | C17  | 112.97(14) | C29  | C28  | C27  | 121.00(17) |
| C15  | C16  | C37  | 110.30(13) | N52  | C20  | C21  | 121.02(19) |
| C37  | C16  | C17  | 113.51(13) | N52  | C20  | C19  | 121.70(18) |
| C9   | C8   | C7   | 178.14(18) | C21  | C20  | C19  | 117.26(16) |
| C22  | C17  | C16  | 121.11(14) | C12  | N43  | C45  | 120.70(19) |
| C18  | C17  | C22  | 116.48(15) | C12  | N43  | C44  | 119.5(2)   |
| C18  | C17  | C16  | 122.39(15) | C44  | N43  | C45  | 119.71(19) |
| N46  | C5   | C6   | 121.58(16) | C19  | C18  | C17  | 122.93(17) |
| N46  | C5   | C4   | 121.63(16) | C18  | C19  | C20  | 120.94(17) |
| C6   | C5   | C4   | 116.79(15) | C12  | C11  | C10  | 121.66(17) |
| C2   | C7   | C8   | 120.63(14) | C31  | C36  | C35  | 121.28(17) |
| C6   | C7   | C2   | 121.29(15) | C15  | C14  | C13  | 122.50(18) |
| C6   | C7   | C8   | 118.07(15) | N43  | C12  | C11  | 121.0(2)   |
| C25  | C30  | C1   | 120.92(15) | N43  | C12  | C13  | 122.0(2)   |
| C29  | C30  | C25  | 116.86(15) | C11  | C12  | C13  | 117.01(17) |
| C29  | C30  | C1   | 122.19(15) | C14  | C13  | C12  | 120.97(18) |
| C20  | N52  | C54  | 119.46(19) | C37  | C42  | C41  | 120.9(2)   |
| C20  | N52  | C53  | 119.0(2)   | C34  | C35  | C36  | 120.68(19) |
| C53  | N52  | C54  | 119.90(19) | C39  | C38  | C37  | 121.0(2)   |
| C2   | C1   | C30  | 114.10(13) | C35  | C34  | C33  | 118.6(2)   |
| C2   | C1   | C31  | 113.35(13) | C40  | C41  | C42  | 120.4(2)   |
| C31  | C1   | C30  | 110.86(14) | C41  | C40  | C39  | 119.6(2)   |
| C5   | C6   | C7   | 121.58(16) | C38  | C39  | C40  | 120.0(2)   |

| <b>Atom</b> | <b>Atom</b> | <b>Atom</b> | <b>Angle/°</b> | <b>Atom</b> | <b>Atom</b> | <b>Atom</b> | <b>Angle/°</b> |
|-------------|-------------|-------------|----------------|-------------|-------------|-------------|----------------|
| C10         | C15         | C16         | 121.08(15)     | C31         | C32         | C33         | 121.2(2)       |
| C14         | C15         | C16         | 122.09(15)     | C32         | C33         | C34         | 120.5(2)       |

**Table S6.** Torsion angles for **3**.

| <b>A</b> | <b>B</b> | <b>C</b> | <b>D</b> | <b>Angle/°</b> | <b>A</b> | <b>B</b> | <b>C</b> | <b>D</b> | <b>Angle/°</b> |
|----------|----------|----------|----------|----------------|----------|----------|----------|----------|----------------|
| N46      | C5       | C6       | C7       | -178.97(15)    | C15      | C10      | C11      | C12      | -0.9(3)        |
| N46      | C5       | C4       | C3       | 179.01(17)     | C15      | C14      | C13      | C12      | -0.5(3)        |
| N49      | C27      | C28      | C29      | 177.49(17)     | C29      | C30      | C1       | C2       | 81.54(19)      |
| C24      | C25      | C30      | C1       | -2.5(2)        | C29      | C30      | C1       | C31      | -47.9(2)       |
| C24      | C25      | C30      | C29      | 175.65(15)     | C10      | C15      | C14      | C13      | 3.0(3)         |
| C24      | C25      | C26      | C27      | -177.63(16)    | C10      | C11      | C12      | N43      | -176.3(2)      |
| C23      | C22      | C17      | C16      | -3.8(2)        | C10      | C11      | C12      | C13      | 3.3(3)         |
| C23      | C22      | C17      | C18      | 177.55(15)     | C26      | C25      | C30      | C1       | 179.94(15)     |
| C23      | C22      | C21      | C20      | -178.84(15)    | C26      | C25      | C30      | C29      | -1.9(2)        |
| C25      | C30      | C1       | C2       | -100.44(17)    | C26      | C27      | C28      | C29      | -1.7(3)        |
| C25      | C30      | C1       | C31      | 130.12(16)     | C31      | C36      | C35      | C34      | -0.6(3)        |
| C25      | C30      | C29      | C28      | 2.0(2)         | C31      | C32      | C33      | C34      | -0.2(5)        |
| C25      | C26      | C27      | N49      | -177.41(17)    | C21      | C22      | C17      | C16      | 178.32(14)     |
| C25      | C26      | C27      | C28      | 1.8(3)         | C21      | C22      | C17      | C18      | -0.4(2)        |
| C22      | C17      | C18      | C19      | 1.1(2)         | C21      | C20      | C19      | C18      | -0.5(3)        |
| C22      | C21      | C20      | N52      | -177.22(17)    | C37      | C16      | C17      | C22      | -89.67(18)     |
| C22      | C21      | C20      | C19      | 1.3(3)         | C37      | C16      | C17      | C18      | 88.93(19)      |
| C2       | C7       | C6       | C5       | -0.4(2)        | C37      | C16      | C15      | C10      | 135.56(17)     |
| C2       | C1       | C31      | C36      | -13.9(2)       | C37      | C16      | C15      | C14      | -44.9(2)       |
| C2       | C1       | C31      | C32      | 165.6(2)       | C37      | C42      | C41      | C40      | -1.2(3)        |
| C2       | C3       | C4       | C5       | 0.4(3)         | C37      | C38      | C39      | C40      | -0.8(4)        |
| C9       | C10      | C11      | C12      | 179.35(19)     | C3       | C2       | C7       | C8       | 178.86(15)     |
| C16      | C17      | C18      | C19      | -177.54(16)    | C3       | C2       | C7       | C6       | 0.1(2)         |
| C16      | C15      | C10      | C9       | -2.9(3)        | C3       | C2       | C1       | C30      | -36.7(2)       |
| C16      | C15      | C10      | C11      | 177.32(17)     | C3       | C2       | C1       | C31      | 91.51(19)      |
| C16      | C15      | C14      | C13      | -176.60(18)    | C4       | C5       | C6       | C7       | 0.7(2)         |
| C16      | C37      | C42      | C41      | -177.45(18)    | N43      | C12      | C13      | C14      | 177.0(2)       |
| C16      | C37      | C38      | C39      | 178.5(2)       | C11      | C12      | C13      | C14      | -2.7(3)        |
| C8       | C7       | C6       | C5       | -179.24(15)    | C36      | C31      | C32      | C33      | -1.2(4)        |
| C17      | C22      | C21      | C20      | -0.9(2)        | C36      | C35      | C34      | C33      | -0.8(4)        |
| C17      | C16      | C15      | C10      | -96.21(19)     | C48      | N46      | C5       | C6       | 179.43(16)     |
| C17      | C16      | C15      | C14      | 83.4(2)        | C48      | N46      | C5       | C4       | -0.3(3)        |
| C17      | C16      | C37      | C42      | -27.0(2)       | C47      | N46      | C5       | C6       | 7.6(3)         |
| C17      | C16      | C37      | C38      | 154.40(17)     | C47      | N46      | C5       | C4       | -172.03(17)    |
| C17      | C18      | C19      | C20      | -0.7(3)        | C14      | C15      | C10      | C9       | 177.48(17)     |
| C7       | C2       | C1       | C30      | 146.32(15)     | C14      | C15      | C10      | C11      | -2.3(3)        |
| C7       | C2       | C1       | C31      | -85.51(18)     | C42      | C37      | C38      | C39      | -0.3(3)        |
| C7       | C2       | C3       | C4       | -0.1(3)        | C42      | C41      | C40      | C39      | 0.1(4)         |
| C30      | C25      | C26      | C27      | 0.0(3)         | C35      | C34      | C33      | C32      | 1.3(5)         |
| C30      | C1       | C31      | C36      | 115.90(19)     | C38      | C37      | C42      | C41      | 1.2(3)         |
| C30      | C1       | C31      | C32      | -64.6(2)       | C51      | N49      | C27      | C26      | -6.2(3)        |
| C30      | C29      | C28      | C27      | -0.2(3)        | C51      | N49      | C27      | C28      | 174.65(18)     |

| <b>A</b> | <b>B</b> | <b>C</b> | <b>D</b> | <b>Angle/°</b> | <b>A</b> | <b>B</b> | <b>C</b> | <b>D</b> | <b>Angle/°</b> |
|----------|----------|----------|----------|----------------|----------|----------|----------|----------|----------------|
| N52      | C20      | C19      | C18      | 177.95(18)     | C50      | N49      | C27      | C26      | -152.38(19)    |
| C1       | C2       | C7       | C8       | -3.9(2)        | C50      | N49      | C27      | C28      | 28.5(3)        |
| C1       | C2       | C7       | C6       | 177.31(14)     | C41      | C40      | C39      | C38      | 0.8(4)         |
| C1       | C2       | C3       | C4       | -177.18(16)    | C54      | N52      | C20      | C21      | -10.1(3)       |
| C1       | C30      | C29      | C28      | -179.87(16)    | C54      | N52      | C20      | C19      | 171.45(19)     |
| C1       | C31      | C36      | C35      | -178.87(18)    | C45      | N43      | C12      | C11      | -5.3(4)        |
| C1       | C31      | C32      | C33      | 179.3(3)       | C45      | N43      | C12      | C13      | 175.1(2)       |
| C6       | C5       | C4       | C3       | -0.7(3)        | C44      | N43      | C12      | C11      | 177.8(2)       |
| C15      | C16      | C17      | C22      | 143.79(15)     | C44      | N43      | C12      | C13      | -1.9(4)        |
| C15      | C16      | C17      | C18      | -37.6(2)       | C53      | N52      | C20      | C21      | -175.5(2)      |
| C15      | C16      | C37      | C42      | 100.97(19)     | C53      | N52      | C20      | C19      | 6.0(3)         |
| C15      | C16      | C37      | C38      | -77.7(2)       | C32      | C31      | C36      | C35      | 1.6(3)         |

**Table S7.** Hydrogen atom coordinates ( $\text{\AA}\times 10^4$ ) and isotropic displacement parameters ( $\text{\AA}^2\times 10^3$ ) for **3**.

| Atom | x        | y       | z        | $U_{eq}$ |
|------|----------|---------|----------|----------|
| H16  | 6825.48  | 2956.44 | 6642.26  | 33       |
| H1   | 4903.56  | 3123.43 | 6340.2   | 33       |
| H6   | 5249.91  | 4394.92 | 4354.03  | 34       |
| H29  | 2113.3   | 2878.26 | 6473.83  | 38       |
| H26  | 3819.71  | 3489.09 | 8767.67  | 39       |
| H21  | 6961.26  | 4333.76 | 8548.56  | 40       |
| H3   | 2443.18  | 3792.96 | 5814.89  | 40       |
| H4   | 2201.03  | 4542.46 | 4947.64  | 42       |
| H28  | 1176.83  | 2941.19 | 7595.22  | 43       |
| H18  | 9467.95  | 3405.79 | 7098.75  | 41       |
| H19  | 9984.79  | 4139.72 | 7929.07  | 46       |
| H11  | 7997.5   | 3282.31 | 4211.99  | 47       |
| H36  | 3230.89  | 2799.99 | 4768.27  | 44       |
| H48A | 2012.12  | 4984.38 | 3732.23  | 62       |
| H48B | 2578.52  | 5578.53 | 3535.73  | 62       |
| H48C | 2327.49  | 5425.32 | 4413.9   | 62       |
| H47A | 5012.79  | 5254.74 | 3780.87  | 61       |
| H47B | 4138.09  | 5439.69 | 3135.73  | 61       |
| H47C | 4542.92  | 4788.78 | 3179.49  | 61       |
| H14  | 9479.29  | 2451.95 | 6455.65  | 47       |
| H13  | 10432.16 | 2471.08 | 5336.3   | 56       |
| H42  | 8777.69  | 2496.94 | 8034.62  | 49       |
| H35  | 2959.21  | 1893.73 | 4235.33  | 53       |
| H38  | 6529.14  | 1938.03 | 6492.66  | 57       |
| H51A | 2866.59  | 3130.75 | 9858.13  | 72       |
| H51B | 1886.53  | 3511.36 | 10111.87 | 72       |
| H51C | 2802.72  | 3796.15 | 9627.21  | 72       |
| H50A | 346.67   | 3032.33 | 8685.34  | 77       |
| H50B | 639.32   | 2966.86 | 9591.32  | 77       |
| H50C | 1107.02  | 2523.33 | 8984.31  | 77       |
| H34  | 3522.64  | 1076.63 | 4905.85  | 69       |
| H41  | 8880.02  | 1578.63 | 8578.44  | 63       |
| H54A | 7584.68  | 5273.23 | 8829.41  | 83       |
| H54B | 8379.14  | 5381.5  | 9557.55  | 83       |
| H54C | 7610.45  | 4835.88 | 9545.54  | 83       |
| H45A | 8864.12  | 2908.2  | 3097.98  | 92       |
| H45B | 9969.29  | 3189.89 | 2888.92  | 92       |
| H45C | 9146.98  | 3546.82 | 3379.86  | 92       |
| H40  | 7797.39  | 846.64  | 8099.94  | 73       |
| H44A | 11394.99 | 2918.59 | 4403.49  | 98       |
| H44B | 11275.31 | 2795    | 3492.08  | 98       |

| <b>Atom</b> | <b>x</b> | <b>y</b> | <b>z</b> | <b><i>U<sub>eq</sub></i></b> |
|-------------|----------|----------|----------|------------------------------|
| H44C        | 10967.64 | 2308.87  | 4099.35  | 98                           |
| H39         | 6601.53  | 1029.93  | 7060.18  | 73                           |
| H53A        | 10380.65 | 4613.26  | 8962.01  | 94                           |
| H53B        | 10018.49 | 5217.68  | 9305.33  | 94                           |
| H53C        | 10058.61 | 5129.09  | 8387.22  | 94                           |
| H32         | 4656.78  | 2088.17  | 6652.4   | 75                           |
| H33         | 4404.57  | 1182.56  | 6114.59  | 101                          |

**Table S8.** Solvent masks information for **3**.

| <b>Number</b> | <b>x</b> | <b>y</b> | <b>z</b> | <b>Volume</b> | <b>Electron count</b> | <b>Content</b> |
|---------------|----------|----------|----------|---------------|-----------------------|----------------|
| 1             | -0.280   | 0.000    | -0.780   | 837.0         | 217.9                 | 4 toluene      |
| 2             | -0.521   | 0.500    | -0.021   | 837.0         | 217.9                 | 4 toluene      |

### **Thermogravimetric Analysis (TGA) of Product 3 in Crystal**

Thermogravimetric analysis was conducted on STA7200. Experimental details were shown below (Table S8).

**Table S9.** Experimental details of TGA.

|                   |                             |
|-------------------|-----------------------------|
| Operator          | TA7000                      |
| Gas               | N <sub>2</sub> (300 mL/min) |
| Material of Pans  | Pt                          |
| Weight of Sample  | 0.58 mg                     |
| Weight of Residue | 0.08 mg                     |

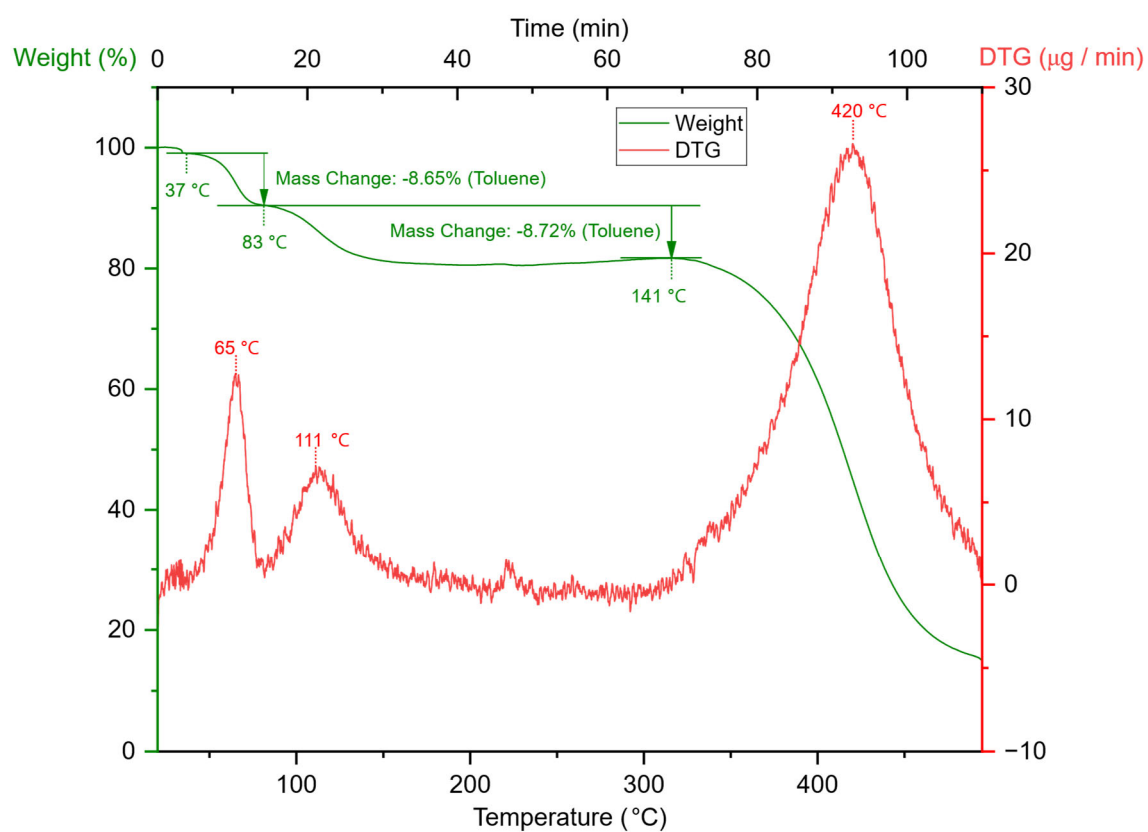

**Figure S5.** Thermogravimetric analysis (TGA) curves of crystal of **3**.

## 4. Photophysical Properties

Cuvettes with a thickness of 1.0 cm were used for the measurement of UV-Vis and fluorescence spectrums (UV-Vis absorption (Abs); Photoluminescence (PL)).

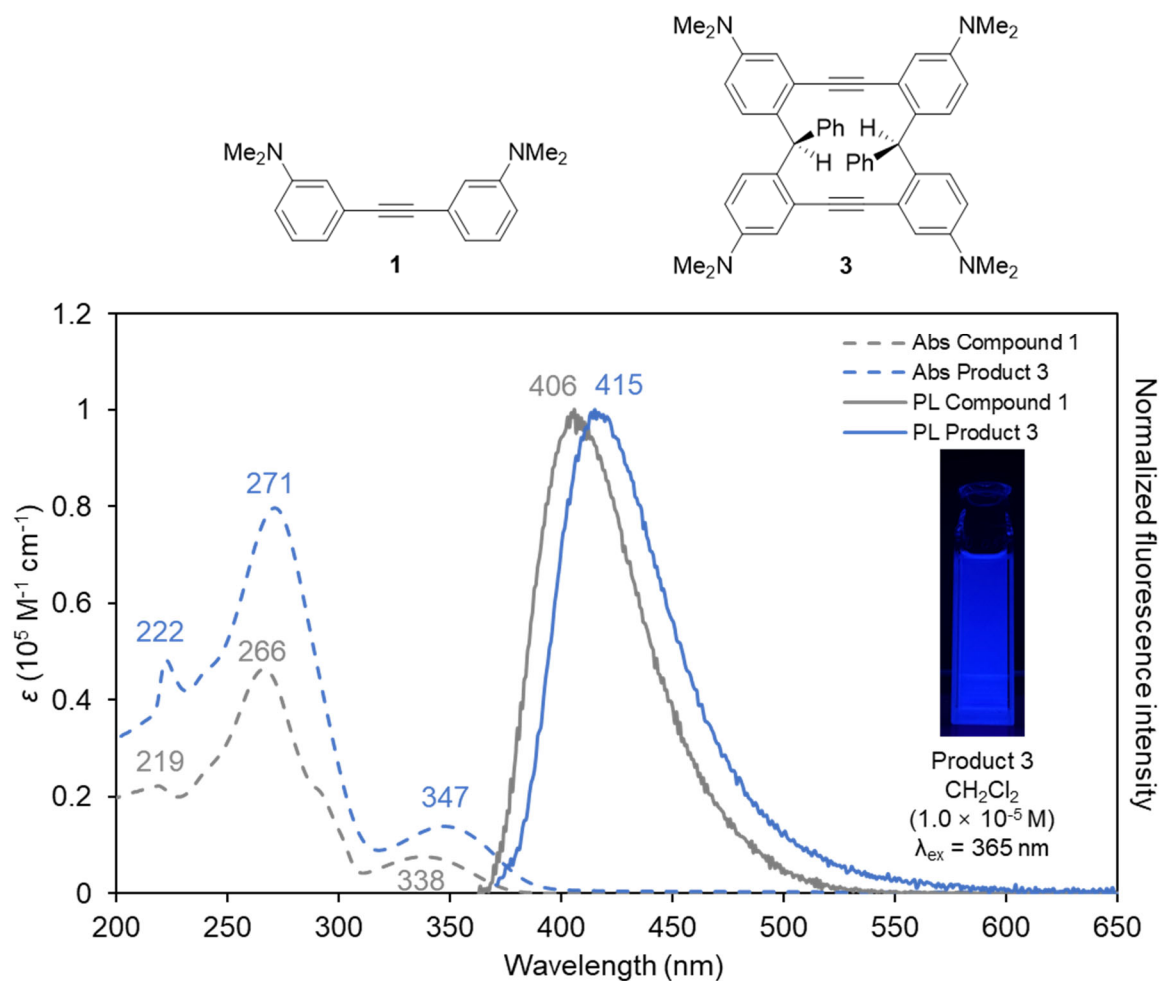

**Figure S6.**

Grey line: UV/Vis spectrum (dashed line) and fluorescence spectrum (solid line) of **1**;  
Blue line: UV/Vis spectrum (dashed line) and fluorescence spectrum (solid line) of **3**.

**Table S10.** Photophysical properties of **1** and **3**.<sup>[a]</sup>

| Compd.   | $\lambda_{ab}$ (nm) | $\lambda_{ex}$ (nm) | $\lambda_{em}$ (nm) | $\phi_F$ | FWHM (nm) |
|----------|---------------------|---------------------|---------------------|----------|-----------|
| <b>1</b> | 219, 266, 338       | 338                 | 406                 | 0.25     | 57        |
| <b>3</b> | 222, 271, 347       | 347                 | 415                 | 0.24     | 60        |

[a] Measured in  $\text{CH}_2\text{Cl}_2$  ( $1.0 \times 10^{-5} \text{ M}$ ).



## 5. Therotical Calculations

### 5.1 Geometry Optimizations

**Table S11.** Atomic coordinates of optimized structure of **1** by DFT, B3LYP/6-31G(d).

| Atom | x           | y           | z           |
|------|-------------|-------------|-------------|
| C    | 0.60815200  | -1.00720200 | -0.01169100 |
| C    | -0.60815200 | -1.00720200 | 0.01169400  |
| C    | 2.03448800  | -1.01466900 | -0.03959900 |
| C    | 2.73794900  | 0.20221500  | -0.04148100 |
| C    | 2.73931500  | -2.23285600 | -0.05900000 |
| C    | 4.14677300  | 0.23686300  | -0.07272100 |
| H    | 2.16155400  | 1.11784900  | -0.01758500 |
| C    | 4.12964800  | -2.20321500 | -0.07549900 |
| H    | 2.19583800  | -3.17148400 | -0.05473800 |
| C    | 4.83214600  | -1.00016400 | -0.07756000 |
| H    | 4.68735900  | -3.13637100 | -0.08217000 |
| H    | 5.91495100  | -1.02816200 | -0.08281000 |
| C    | -2.03448900 | -1.01466900 | 0.03960100  |
| C    | -2.73794900 | 0.20221400  | 0.04148400  |
| C    | -2.73931600 | -2.23285600 | 0.05900000  |
| C    | -4.14677300 | 0.23686300  | 0.07272300  |
| H    | -2.16155400 | 1.11784800  | 0.01758900  |
| C    | -4.12964900 | -2.20321500 | 0.07549700  |
| H    | -2.19583800 | -3.17148400 | 0.05473700  |
| C    | -4.83214600 | -1.00016400 | 0.07755900  |
| H    | -4.68735900 | -3.13637100 | 0.08216600  |
| H    | -5.91495100 | -1.02816200 | 0.08280700  |
| N    | 4.83706900  | 1.44604800  | -0.10788000 |
| N    | -4.83706900 | 1.44604800  | 0.10788500  |
| C    | 6.27315700  | 1.44667100  | 0.11121200  |
| H    | 6.64406900  | 2.47118500  | 0.03906900  |
| H    | 6.55962900  | 1.04462900  | 1.09702000  |
| H    | 6.78788500  | 0.85709000  | -0.65667400 |
| C    | 4.11205300  | 2.68158300  | 0.13371100  |
| H    | 4.80404000  | 3.52248900  | 0.05304100  |
| H    | 3.32743400  | 2.82842700  | -0.61781200 |

| Atom | x           | y          | z           |
|------|-------------|------------|-------------|
| H    | 3.63956900  | 2.71665400 | 1.12914500  |
| C    | -6.27315600 | 1.44667100 | -0.11121900 |
| H    | -6.64406900 | 2.47118500 | -0.03907200 |
| H    | -6.55962000 | 1.04463600 | -1.09703200 |
| H    | -6.78788900 | 0.85708600 | 0.65666000  |
| C    | -4.11205300 | 2.68158300 | -0.13371000 |
| H    | -4.80403800 | 3.52248900 | -0.05303500 |
| H    | -3.32743100 | 2.82842500 | 0.61781000  |
| H    | -3.63957400 | 2.71665400 | -1.12914600 |

**Table S12.** Calculation details of diarylalkyne **1** by DFT, B3LYP/6-31G(d).

|                                             |                                                |              |
|---------------------------------------------|------------------------------------------------|--------------|
| <b>Calculation Type</b>                     | FREQ                                           |              |
| <b>Calculation Method</b>                   | B3LYP                                          |              |
| <b>Formula</b>                              | C <sub>18</sub> H <sub>20</sub> N <sub>2</sub> |              |
| <b>Basis Set</b>                            | 6-31G(d)                                       |              |
| <b>Charge</b>                               | 0                                              |              |
| <b>Spin</b>                                 | Singlet                                        |              |
| <b>Solvation</b>                            | None                                           |              |
| <b>E(RB3LYP)</b>                            | -807.39544                                     | Hartree      |
| <b>RMS Gradient Norm</b>                    | 1.08E-07                                       | Hartree/Bohr |
| <b>Dipole Moment</b>                        | 3.2033                                         | Debye        |
| <b>Polarizability (<math>\alpha</math>)</b> | 237.85256                                      | a.u.         |
| <b>Point Group</b>                          | C <sub>1</sub>                                 |              |
| <b>Molecular Mass</b>                       | 264.16265                                      | amu          |
| <b>Temperature</b>                          | 298.15                                         | Kelvin       |
| <b>Pressure</b>                             | 1                                              | atm          |
| <b>Frequencies scaled by</b>                | 1                                              |              |
| <b>Electronic Energy (EE)</b>               | -807.39544                                     | Hartree      |
| <b>Zero-point Energy Correction</b>         | 0.338556                                       | Hartree      |
| <b>Thermal Correction to Energy</b>         | 0.358449                                       | Hartree      |
| <b>Thermal Correction to Enthalpy</b>       | 0.359393                                       | Hartree      |
| <b>Thermal Correction to Free Energy</b>    | 0.287409                                       | Hartree      |
| <b>EE + Zero-point Energy</b>               | -807.05688                                     | Hartree      |
| <b>EE + Thermal Energy Correction</b>       | -807.03699                                     | Hartree      |
| <b>EE + Thermal Enthalpy Correction</b>     | -807.03604                                     | Hartree      |
| <b>EE + Thermal Free Energy Correction</b>  | -807.10803                                     | Hartree      |

|                                |           |                |
|--------------------------------|-----------|----------------|
| <b>E (Thermal)</b>             | 224.93    | kcal/mol       |
| <b>Heat Capacity (Cv)</b>      | 74.417    | cal/mol-kelvin |
| <b>Entropy (S)</b>             | 151.503   | cal/mol-kelvin |
| <b>Step number</b>             | 1         |                |
| <b>Maximum force</b>           | 1.00E-06  | Converged      |
| <b>RMS force</b>               | 0         | Converged      |
| <b>Maximum displacement</b>    | 0.000192  | Not converged  |
| <b>RMS displacement</b>        | 4.80E-05  | Not converged  |
| <b>Predicted energy change</b> | -8.22E-12 | Hartree        |

---

**Table S13.** Atomic coordinates of optimized structure of **3** by DFT, B3LYP/6-31G(d).

| Atom | x           | y           | z           |
|------|-------------|-------------|-------------|
| C    | -2.75253000 | -1.47517100 | -0.08575900 |
| C    | -2.97795200 | -0.22591600 | -0.70666900 |
| C    | -4.22037500 | -0.02395200 | -1.30710400 |
| C    | -5.22264300 | -0.98794500 | -1.28553700 |
| C    | -5.01087200 | -2.23683200 | -0.66186700 |
| C    | -3.75811500 | -2.45376100 | -0.06016500 |
| H    | -4.40841700 | 0.91790900  | -1.81481500 |
| H    | -6.16781700 | -0.76534600 | -1.76467200 |
| H    | -3.53132400 | -3.39215100 | 0.42773700  |
| C    | -1.48552100 | -1.76297300 | 0.50103300  |
| C    | -0.37707400 | -1.97227200 | 0.95336800  |
| C    | 0.93164600  | -2.19546100 | 1.47175700  |
| C    | 1.06583600  | -2.90330500 | 2.67578500  |
| C    | 2.06930300  | -1.70343500 | 0.78924300  |
| C    | 2.32674900  | -3.15800900 | 3.24423000  |
| H    | 0.15928900  | -3.24020800 | 3.16027100  |
| C    | 3.31144800  | -1.94443900 | 1.37334300  |
| C    | 3.45293100  | -2.64534500 | 2.56726100  |
| H    | 4.20312600  | -1.55923000 | 0.89009500  |
| H    | 4.44828000  | -2.78450200 | 2.97031200  |
| C    | -2.05269100 | 1.79310200  | 0.51217100  |
| C    | -0.90735800 | 2.39126100  | 1.08862700  |
| C    | -1.02846800 | 3.30117700  | 2.14998400  |
| C    | -3.41829200 | 3.04767900  | 2.10099100  |
| C    | -2.28207500 | 3.64253100  | 2.68823600  |
| H    | -0.11765200 | 3.72739600  | 2.54860700  |
| H    | -4.41141800 | 3.27983300  | 2.46490200  |
| C    | 2.97689700  | 0.07606000  | -0.76967700 |
| C    | 4.21236800  | -0.22789600 | -1.34074600 |
| C    | 2.75764500  | 1.41390300  | -0.37094600 |
| C    | 5.21369600  | 0.72437500  | -1.49812900 |
| H    | 4.39550500  | -1.24374400 | -1.67945900 |
| C    | 3.76226800  | 2.38136300  | -0.52712200 |
| C    | 5.00784700  | 2.06255200  | -1.09751800 |
| H    | 6.15342900  | 0.42129900  | -1.94255700 |

| Atom | x           | y           | z           |
|------|-------------|-------------|-------------|
| H    | 3.54029900  | 3.39015300  | -0.20594700 |
| C    | 1.49783100  | 1.79939500  | 0.17384000  |
| C    | 1.78690400  | -1.92330500 | -1.73837400 |
| C    | 1.40067700  | -1.37715000 | -2.97111700 |
| C    | 2.03282700  | -3.29486800 | -1.66034700 |
| C    | 1.25160900  | -2.18461100 | -4.09462400 |
| H    | 1.21754700  | -0.30855000 | -3.04192500 |
| C    | 1.88986000  | -4.10756900 | -2.78904400 |
| H    | 2.32711500  | -3.73221600 | -0.71201200 |
| C    | 1.49670900  | -3.55835000 | -4.00748800 |
| H    | 0.94464100  | -1.74311700 | -5.03939100 |
| H    | 2.08354000  | -5.17417100 | -2.70959900 |
| H    | 1.38083200  | -4.19174100 | -4.88277100 |
| N    | 2.45496300  | -3.89003500 | 4.42307100  |
| N    | 5.98955300  | 3.03348000  | -1.27837700 |
| N    | -5.99377900 | -3.22315400 | -0.66007400 |
| N    | -2.39308900 | 4.51966000  | 3.76488600  |
| C    | -1.23167200 | 5.30232200  | 4.14598800  |
| H    | -1.48944800 | 5.92700800  | 5.00363500  |
| H    | -0.40645300 | 4.64910000  | 4.45004400  |
| H    | -0.86754100 | 5.95551200  | 3.33570000  |
| C    | -3.70027500 | 5.06282900  | 4.08506100  |
| H    | -4.14611500 | 5.63263400  | 3.25292400  |
| H    | -4.39745700 | 4.26324200  | 4.35903100  |
| H    | -3.60815800 | 5.72676300  | 4.94697100  |
| C    | -7.34725500 | -2.85765800 | -1.03491100 |
| H    | -7.38178700 | -2.49723700 | -2.06916100 |
| H    | -7.98414300 | -3.74240800 | -0.97504400 |
| H    | -7.77697800 | -2.07536100 | -0.38755500 |
| C    | -5.82324800 | -4.37407000 | 0.20754800  |
| H    | -4.92298200 | -4.93603100 | -0.06482300 |
| H    | -5.74448800 | -4.10134600 | 1.27288600  |
| H    | -6.67771800 | -5.04244900 | 0.08432700  |
| C    | 7.33872700  | 2.60724700  | -1.60097800 |
| H    | 7.36079000  | 2.07339700  | -2.55766500 |
| H    | 7.97537600  | 3.48832300  | -1.70286800 |
| H    | 7.77722700  | 1.94815200  | -0.83349000 |

| Atom | x           | y           | z           |
|------|-------------|-------------|-------------|
| C    | 5.82857000  | 4.31681500  | -0.62000700 |
| H    | 4.92449700  | 4.82454000  | -0.97408100 |
| H    | 5.76305800  | 4.23183200  | 0.47729100  |
| H    | 6.68083600  | 4.95299000  | -0.86692200 |
| C    | 3.72877400  | -3.86513300 | 5.11855800  |
| H    | 3.65789300  | -4.48828100 | 6.01239400  |
| H    | 4.52301700  | -4.28191800 | 4.48954400  |
| H    | 4.03364800  | -2.85058200 | 5.42451700  |
| C    | 1.26634100  | -4.13555400 | 5.21981900  |
| H    | 0.77644400  | -3.20840500 | 5.56017500  |
| H    | 0.53222000  | -4.71687200 | 4.65139900  |
| H    | 1.54210400  | -4.72347300 | 6.09767900  |
| C    | -3.28955100 | 2.14621100  | 1.04875100  |
| H    | -4.18823300 | 1.70000000  | 0.63603300  |
| C    | -1.91039300 | 0.85376300  | -0.67772300 |
| H    | -0.95665300 | 0.33829100  | -0.54201700 |
| C    | 0.39505700  | 2.08364800  | 0.59831500  |
| C    | -1.80160000 | 1.57593800  | -2.01944600 |
| C    | -2.04461000 | 2.94140700  | -2.17481100 |
| C    | -1.43290300 | 0.82498500  | -3.14519700 |
| C    | -1.91609100 | 3.54783900  | -3.42804700 |
| H    | -2.32554100 | 3.53589900  | -1.31176800 |
| C    | -1.29823600 | 1.42709200  | -4.39251500 |
| H    | -1.25202900 | -0.24052700 | -3.03384500 |
| C    | -1.54040300 | 2.79627000  | -4.53925800 |
| H    | -2.10735000 | 4.61294500  | -3.53041700 |
| H    | -1.00475900 | 0.82890100  | -5.25143500 |
| H    | -1.43579200 | 3.26960700  | -5.51174500 |
| C    | 1.91126700  | -0.98157100 | -0.54202700 |
| H    | 0.95852100  | -0.44970300 | -0.48485800 |

**Table S14.** Calculation details of **3** by DFT, B3LYP/6-31G(d).

|                           |                                                |
|---------------------------|------------------------------------------------|
| <b>Calculation Type</b>   | FREQ                                           |
| <b>Calculation Method</b> | B3LYP                                          |
| <b>Formula</b>            | C <sub>50</sub> H <sub>48</sub> N <sub>4</sub> |
| <b>Basis Set</b>          | 6-31G(d)                                       |

|                                             |                |                |
|---------------------------------------------|----------------|----------------|
| <b>Charge</b>                               | 0              |                |
| <b>Spin</b>                                 | Singlet        |                |
| <b>Solvation</b>                            | None           |                |
| <b>E(RB3LYP)</b>                            | -2153.3719     | Hartree        |
| <b>RMS Gradient Norm</b>                    | 1.21E-07       | Hartree/Bohr   |
| <b>Dipole Moment</b>                        | 3.8892506      | Debye          |
| <b>Polarizability (<math>\alpha</math>)</b> | 613.13214      | a.u.           |
| <b>Point Group</b>                          | C <sub>1</sub> |                |
| <b>Molecular Mass</b>                       | 704.3879       | amu            |
| <b>Temperature</b>                          | 298.15         | Kelvin         |
| <b>Pressure</b>                             | 1              | atm            |
| <b>Frequencies scaled by</b>                | 1              |                |
| <b>Electronic Energy (EE)</b>               | -2153.3719     | Hartree        |
| <b>Zero-point Energy Correction</b>         | 0.857797       | Hartree        |
| <b>Thermal Correction to Energy</b>         | 0.908123       | Hartree        |
| <b>Thermal Correction to Enthalpy</b>       | 0.909068       | Hartree        |
| <b>Thermal Correction to Free Energy</b>    | 0.768641       | Hartree        |
| <b>EE + Zero-point Energy</b>               | -2152.5141     | Hartree        |
| <b>EE + Thermal Energy Correction</b>       | -2152.4638     | Hartree        |
| <b>EE + Thermal Enthalpy Correction</b>     | -2152.4629     | Hartree        |
| <b>EE + Thermal Free Energy Correction</b>  | -2152.6033     | Hartree        |
| <b>E (Thermal)</b>                          | 569.856        | kcal/mol       |
| <b>Heat Capacity (Cv)</b>                   | 193.656        | cal/mol-kelvin |
| <b>Entropy (S)</b>                          | 295.553        | cal/mol-kelvin |
| <b>Step number</b>                          | 1              |                |
| <b>Maximum force</b>                        | 0              | Converged      |
| <b>RMS force</b>                            | 0              | Converged      |
| <b>Maximum displacement</b>                 | 8.30E-05       | Not converged  |
| <b>RMS displacement</b>                     | 1.30E-05       | Converged      |
| <b>Predicted energy change</b>              | -1.43E-11      | Hartree        |

---

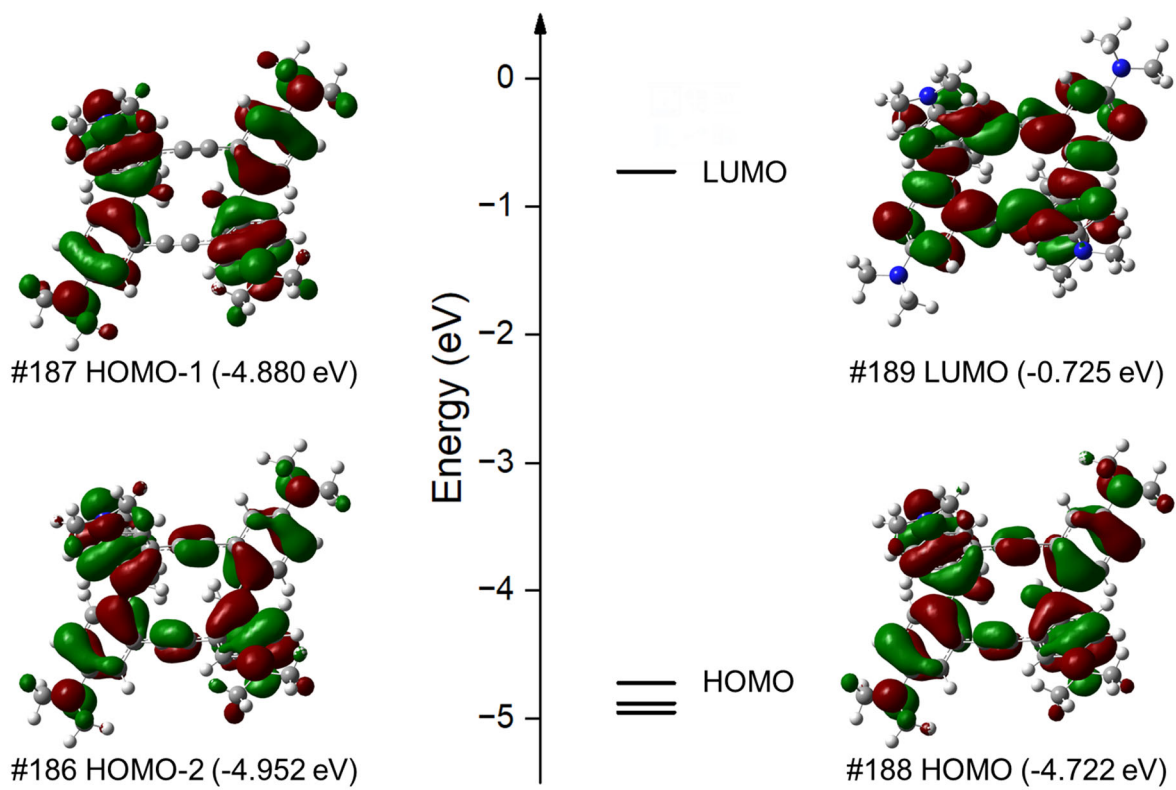

**Figure S7.** Molecular orbitals of  $(R_a,R_a)$ -**3** with the energy levels (Isovalue = 0.02).



## 5.2 Energy Barrier for the Interconversion of Two Enantiomers

Table S15. Atomic coordinates of (*R*<sub>a</sub>,*R*<sub>a</sub>)-**3**.

| Atom | x           | y           | z           |
|------|-------------|-------------|-------------|
| C    | -2.86950400 | -1.23888200 | -0.23023500 |
| C    | -2.98440400 | 0.06681800  | -0.75840400 |
| C    | -4.20063000 | 0.41588500  | -1.34477600 |
| C    | -5.28031800 | -0.45928200 | -1.39579600 |
| C    | -5.17900600 | -1.76373000 | -0.86500600 |
| C    | -3.95375000 | -2.12861900 | -0.27837700 |
| H    | -4.30489900 | 1.40469500  | -1.78253900 |
| H    | -6.19957500 | -0.12350500 | -1.85915200 |
| H    | -3.81034200 | -3.11583200 | 0.13984000  |
| C    | -1.63582000 | -1.67407300 | 0.33643500  |
| C    | -0.55234300 | -2.00712800 | 0.77485600  |
| C    | 0.72887700  | -2.37570800 | 1.27874000  |
| C    | 0.79358800  | -3.17580600 | 2.42957800  |
| C    | 1.90922100  | -1.93331400 | 0.63589700  |
| C    | 2.02412300  | -3.57445400 | 2.98163100  |
| H    | -0.14189600 | -3.46915700 | 2.88660600  |
| C    | 3.12205200  | -2.31807200 | 1.20436800  |
| C    | 3.19468900  | -3.11116800 | 2.34561600  |
| H    | 4.04672000  | -1.97544600 | 0.75205000  |
| H    | 4.17157800  | -3.36122100 | 2.74019100  |
| C    | -1.90261800 | 1.90807900  | 0.60501600  |
| C    | -0.71558700 | 2.36560200  | 1.22424300  |
| C    | -0.76805600 | 3.20452900  | 2.34785900  |
| C    | -3.17029900 | 3.15612200  | 2.27788900  |
| C    | -1.99269500 | 3.61022000  | 2.90775100  |
| H    | 0.17222600  | 3.52341000  | 2.77718400  |
| H    | -4.14319800 | 3.44407100  | 2.65629100  |
| C    | 2.97523900  | -0.12972400 | -0.78924300 |
| C    | 4.18538900  | -0.49478300 | -1.37848700 |
| C    | 2.86575800  | 1.18979700  | -0.29545200 |
| C    | 5.26419600  | 0.37868400  | -1.46494000 |
| H    | 4.28549500  | -1.49548000 | -1.78932800 |
| C    | 3.94916500  | 2.07793100  | -0.37948900 |

| Atom | x           | y           | z           |
|------|-------------|-------------|-------------|
| C    | 5.16811500  | 1.69718100  | -0.96908400 |
| H    | 6.17868500  | 0.03027900  | -1.92839400 |
| H    | 3.81005800  | 3.07615300  | 0.01330000  |
| C    | 1.63839200  | 1.64008800  | 0.27317900  |
| C    | 1.63004100  | -1.94781100 | -1.90154300 |
| C    | 1.30020200  | -1.28473900 | -3.09261000 |
| C    | 1.76082400  | -3.33712500 | -1.92170400 |
| C    | 1.09355900  | -1.99470900 | -4.27148300 |
| H    | 1.20688300  | -0.20227900 | -3.08680300 |
| C    | 1.55975700  | -4.05245500 | -3.10607800 |
| H    | 2.01049300  | -3.86391000 | -1.00663600 |
| C    | 1.22314600  | -3.38680100 | -4.28269400 |
| H    | 0.83173400  | -1.46286900 | -5.18270200 |
| H    | 1.66366200  | -5.13442400 | -3.10305300 |
| H    | 1.06200000  | -3.94423500 | -5.20140500 |
| N    | 2.08109400  | -4.39581200 | 4.10595700  |
| N    | 6.22916100  | 2.59249300  | -1.07748800 |
| N    | -6.24108400 | -2.66131300 | -0.93755500 |
| N    | -2.03790500 | 4.41396900  | 4.04476600  |
| C    | -0.81796700 | 5.06690900  | 4.48303100  |
| H    | -1.02887800 | 5.64747200  | 5.38341700  |
| H    | -0.05253000 | 4.32644800  | 4.73984500  |
| H    | -0.39459500 | 5.74401200  | 3.72270200  |
| C    | -3.29748400 | 5.04020800  | 4.40194700  |
| H    | -3.68825400 | 5.70387000  | 3.61279900  |
| H    | -4.06088500 | 4.28413200  | 4.61647700  |
| H    | -3.15648700 | 5.63021400  | 5.30979700  |
| C    | -7.55602800 | -2.15680100 | -1.28730100 |
| H    | -7.55172300 | -1.72044100 | -2.29245100 |
| H    | -8.26535400 | -2.98675000 | -1.29366000 |
| H    | -7.92387000 | -1.39029000 | -0.58525100 |
| C    | -6.17465300 | -3.88263400 | -0.15625600 |
| H    | -5.32260100 | -4.49716200 | -0.46744300 |
| H    | -6.08169800 | -3.69586900 | 0.92633700  |
| H    | -7.08121100 | -4.46585700 | -0.32957200 |
| C    | 7.54042000  | 2.07850400  | -1.42739700 |
| H    | 7.52533500  | 1.61458300  | -2.42001200 |

| Atom | x           | y           | z           |
|------|-------------|-------------|-------------|
| H    | 8.24938200  | 2.90797300  | -1.46433300 |
| H    | 7.91608700  | 1.33163500  | -0.70852000 |
| C    | 6.17106000  | 3.83423000  | -0.32845900 |
| H    | 5.31569800  | 4.44046200  | -0.64680800 |
| H    | 6.08969000  | 3.67651200  | 0.75969800  |
| H    | 7.07569400  | 4.41239000  | -0.52698200 |
| C    | 3.34666700  | -4.52646800 | 4.80466000  |
| H    | 3.21664600  | -5.20284300 | 5.65194400  |
| H    | 4.10875000  | -4.96289500 | 4.14971800  |
| H    | 3.73228400  | -3.56497900 | 5.18244300  |
| C    | 0.86955300  | -4.59619600 | 4.88051200  |
| H    | 0.45575000  | -3.65738900 | 5.28406900  |
| H    | 0.09432300  | -5.07291300 | 4.27084000  |
| H    | 1.08807000  | -5.26506400 | 5.71549200  |
| C    | -3.10958600 | 2.32438900  | 1.16388900  |
| H    | -4.03934700 | 1.98558100  | 0.71912600  |
| C    | -1.83018600 | 1.04762600  | -0.64909300 |
| H    | -0.92435900 | 0.44501000  | -0.54862400 |
| C    | 0.56011200  | 1.98529000  | 0.71503300  |
| C    | -1.65011700 | 1.85239500  | -1.93500300 |
| C    | -1.77543000 | 3.24122400  | -1.99158100 |
| C    | -1.33764400 | 1.15579200  | -3.11155500 |
| C    | -1.58624200 | 3.92316900  | -3.19741700 |
| H    | -2.01152400 | 3.79380300  | -1.08819900 |
| C    | -1.14270800 | 1.83248300  | -4.31179000 |
| H    | -1.24856200 | 0.07352200  | -3.07737400 |
| C    | -1.26689300 | 3.22429300  | -4.35947700 |
| H    | -1.68578200 | 5.00527800  | -3.22274500 |
| H    | -0.89428400 | 1.27487100  | -5.21126800 |
| H    | -1.11496500 | 3.75576700  | -5.29498700 |
| C    | 1.82299500  | -1.10758300 | -0.64046500 |
| H    | 0.91768000  | -0.50298000 | -0.54728500 |

**Table S16.** Calculation details of  $(R_a, R_a)$ -3.

|                           |        |
|---------------------------|--------|
| <b>Calculation Type</b>   | SCAN   |
| <b>Calculation Method</b> | RB3LYP |

|                          |                                                |              |
|--------------------------|------------------------------------------------|--------------|
| <b>Formula</b>           | C <sub>50</sub> H <sub>48</sub> N <sub>4</sub> |              |
| <b>Basis Set</b>         | 6-31G(d)                                       |              |
| <b>Charge</b>            | 0                                              |              |
| <b>Spin</b>              | Singlet                                        |              |
| <b>Solvation</b>         | None                                           |              |
| <b>E(RB3LYP)</b>         | -2153.37193                                    | Hartree      |
| <b>RMS Gradient Norm</b> | 4.48E-06                                       | Hartree/Bohr |
| <b>Dipole Moment</b>     | 3.889296                                       | Debye        |
| <b>Point Group</b>       | C <sub>1</sub>                                 |              |
| <b>Molecular Mass</b>    | 704.3879                                       | amu          |

---

**Table S17.** Atomic coordinates of TS-3.

| Atom | x           | y           | z           |
|------|-------------|-------------|-------------|
| C    | -1.64535100 | -2.47587800 | 0.60877200  |
| C    | -2.63556700 | -1.59202700 | 0.12666000  |
| C    | -3.96294600 | -1.93586500 | 0.39007300  |
| C    | -4.32026800 | -3.08088400 | 1.09041100  |
| C    | -3.33750400 | -3.97435000 | 1.56829600  |
| C    | -1.99773700 | -3.63776300 | 1.32020700  |
| H    | -4.75760700 | -1.28173500 | 0.05351100  |
| H    | -5.37151600 | -3.27280300 | 1.26526300  |
| H    | -1.19154500 | -4.26626400 | 1.67358800  |
| C    | -0.25623400 | -2.24662200 | 0.39301200  |
| C    | 0.94748600  | -2.12847400 | 0.27227900  |
| C    | 2.36938900  | -2.04155600 | 0.25980600  |
| C    | 3.08169900  | -3.17922500 | 0.67730000  |
| C    | 3.04014700  | -0.84216000 | -0.07049900 |
| C    | 4.48183500  | -3.17643500 | 0.78533100  |
| H    | 2.50658800  | -4.05926300 | 0.93173000  |
| C    | 4.42663900  | -0.84062300 | 0.09273700  |
| C    | 5.13958200  | -1.96005000 | 0.50888000  |
| H    | 4.98395800  | 0.06987900  | -0.08750100 |
| H    | 6.21342100  | -1.87574200 | 0.61987400  |
| C    | -2.96804000 | 0.89333000  | -0.16003300 |
| C    | -2.29564700 | 1.85403700  | 0.62533600  |
| C    | -2.99218800 | 2.94947100  | 1.16915400  |
| C    | -5.00749100 | 2.22378800  | 0.08231200  |
| C    | -4.36428000 | 3.14271300  | 0.94048900  |
| H    | -2.42179700 | 3.65942000  | 1.75250500  |
| H    | -6.04788900 | 2.35466300  | -0.18736000 |
| C    | 2.61589700  | 1.67945500  | 0.00703500  |
| C    | 3.84367000  | 2.30297600  | -0.22294100 |
| C    | 1.69887400  | 2.36698800  | 0.83549400  |
| C    | 4.21865800  | 3.48057500  | 0.41308200  |
| H    | 4.52776900  | 1.87077300  | -0.94612100 |
| C    | 2.07444900  | 3.55032400  | 1.49527200  |
| C    | 3.34441800  | 4.12355800  | 1.31577900  |
| H    | 5.19194700  | 3.90183800  | 0.19429200  |

| Atom | x           | y           | z           |
|------|-------------|-------------|-------------|
| H    | 1.33306900  | 4.03025500  | 2.12007700  |
| C    | 0.32365200  | 1.98738600  | 0.89733900  |
| C    | 2.24004700  | 0.39909500  | -2.13943600 |
| C    | 1.08113300  | 0.84776100  | -2.78500700 |
| C    | 3.34329100  | 0.03686300  | -2.91819500 |
| C    | 1.02440100  | 0.93494800  | -4.17382000 |
| H    | 0.21417900  | 1.12236400  | -2.19144800 |
| C    | 3.29392400  | 0.13442900  | -4.30994900 |
| H    | 4.23738800  | -0.34933300 | -2.43936100 |
| C    | 2.13482800  | 0.58232100  | -4.94289500 |
| H    | 0.10534200  | 1.25881400  | -4.65160600 |
| H    | 4.16054300  | -0.15401400 | -4.89947600 |
| H    | 2.09232800  | 0.64525000  | -6.02696800 |
| N    | 5.18607400  | -4.32044900 | 1.15467000  |
| N    | 3.70654100  | 5.30114500  | 1.96518900  |
| N    | -3.68107800 | -5.14141100 | 2.24616700  |
| N    | -5.05564300 | 4.20276200  | 1.52098000  |
| C    | -4.29588000 | 5.26241600  | 2.15841700  |
| H    | -4.98930200 | 5.99131800  | 2.58288100  |
| H    | -3.69197300 | 4.86288300  | 2.98030100  |
| H    | -3.62036100 | 5.78757500  | 1.46292500  |
| C    | -6.37116300 | 4.54034900  | 1.00861000  |
| H    | -6.36014000 | 4.82431800  | -0.05674000 |
| H    | -7.06197600 | 3.69862400  | 1.12808800  |
| H    | -6.77203900 | 5.37745200  | 1.58372900  |
| C    | -5.03985700 | -5.28505300 | 2.73681900  |
| H    | -5.75607300 | -5.27312000 | 1.90793800  |
| H    | -5.13612100 | -6.25005200 | 3.23850200  |
| H    | -5.32758300 | -4.49290400 | 3.44760700  |
| C    | -2.63783600 | -5.86862800 | 2.94606700  |
| H    | -1.86756700 | -6.21007300 | 2.24583300  |
| H    | -2.14468700 | -5.26791600 | 3.72802800  |
| H    | -3.07339500 | -6.75425100 | 3.41316400  |
| C    | 5.10314600  | 5.69641300  | 1.95719800  |
| H    | 5.44756000  | 5.89457400  | 0.93587800  |
| H    | 5.21432800  | 6.62228900  | 2.52492600  |
| H    | 5.76747700  | 4.93527600  | 2.39848800  |

| Atom | x           | y           | z           |
|------|-------------|-------------|-------------|
| C    | 2.87913100  | 5.76914200  | 3.06201300  |
| H    | 1.87018500  | 6.01562300  | 2.71195600  |
| H    | 2.78517100  | 5.02914100  | 3.87359800  |
| H    | 3.31541600  | 6.68126700  | 3.47382900  |
| C    | 6.57294700  | -4.18070900 | 1.55952400  |
| H    | 6.97231900  | -5.16685900 | 1.80519300  |
| H    | 7.17757200  | -3.77620700 | 0.74049300  |
| H    | 6.70302400  | -3.52431800 | 2.43598700  |
| C    | 4.44612200  | -5.44678900 | 1.69329200  |
| H    | 3.90278000  | -5.20274900 | 2.62142500  |
| H    | 3.71878600  | -5.81553600 | 0.96205700  |
| H    | 5.14222200  | -6.26121300 | 1.90452000  |
| C    | -4.31513300 | 1.13971300  | -0.44124700 |
| H    | -4.83710300 | 0.47718100  | -1.12471800 |
| C    | -2.25530800 | -0.34611800 | -0.67294900 |
| H    | -1.18572300 | -0.18883500 | -0.49382900 |
| C    | -0.88073800 | 1.83155800  | 0.81161900  |
| C    | -2.39951900 | -0.54010900 | -2.18692100 |
| C    | -2.52075600 | 0.56842100  | -3.03609600 |
| C    | -2.32869300 | -1.81291700 | -2.76372900 |
| C    | -2.57805600 | 0.40855900  | -4.42013300 |
| H    | -2.57468500 | 1.56422600  | -2.60819200 |
| C    | -2.37740500 | -1.97449900 | -4.14857600 |
| H    | -2.23109400 | -2.68390000 | -2.12485400 |
| C    | -2.50514400 | -0.86556000 | -4.98420300 |
| H    | -2.68041200 | 1.28326900  | -5.05757800 |
| H    | -2.31660300 | -2.97284300 | -4.57359200 |
| H    | -2.54753400 | -0.99207000 | -6.06247900 |
| C    | 2.24374300  | 0.33959600  | -0.61117400 |
| H    | 1.20790500  | 0.15605800  | -0.32027800 |

**Table S18.** Calculation details of TS-3.

|                           |                                                |
|---------------------------|------------------------------------------------|
| <b>Calculation Type</b>   | SCAN                                           |
| <b>Calculation Method</b> | B3LYP                                          |
| <b>Formula</b>            | C <sub>50</sub> H <sub>48</sub> N <sub>4</sub> |
| <b>Basis Set</b>          | 6-31G(d)                                       |

|                          |                |              |
|--------------------------|----------------|--------------|
| <b>Charge</b>            | 0              |              |
| <b>Spin</b>              | Singlet        |              |
| <b>Solvation</b>         | None           |              |
| <b>E(RB3LYP)</b>         | -2153.359907   | Hartree      |
| <b>RMS Gradient Norm</b> | 0.000157389    | Hartree/Bohr |
| <b>Dipole Moment</b>     | Debye          |              |
| <b>Point Group</b>       | C <sub>1</sub> |              |
| <b>Molecular Mass</b>    | 704.3879       | amu          |

---



**Table S19.** Atomic coordinates of ( $S_a, S_a$ )-**3**.

| Atoms | x           | y           | z           |
|-------|-------------|-------------|-------------|
| C     | -0.77868900 | -2.53155600 | 1.11691700  |
| C     | -1.96930000 | -2.00209600 | 0.56595300  |
| C     | -3.17170800 | -2.45776900 | 1.10437900  |
| C     | -3.22546300 | -3.40108200 | 2.12584300  |
| C     | -2.04487000 | -3.95407800 | 2.66403900  |
| C     | -0.82469800 | -3.48461800 | 2.14686600  |
| H     | -4.10443500 | -2.05294800 | 0.72713200  |
| H     | -4.19552300 | -3.69866900 | 2.50391700  |
| H     | 0.11861900  | -3.83982400 | 2.53935400  |
| C     | 0.49865600  | -2.10014100 | 0.65726900  |
| C     | 1.59375800  | -1.72779700 | 0.28424500  |
| C     | 2.85141000  | -1.28393600 | -0.21744800 |
| C     | 3.92487200  | -2.18883400 | -0.25220000 |
| C     | 3.00143500  | 0.03066300  | -0.71335300 |
| C     | 5.17077500  | -1.83272400 | -0.79801200 |
| H     | 3.75422600  | -3.18234400 | 0.14010800  |
| C     | 4.23588700  | 0.36677700  | -1.27027000 |
| C     | 5.30327300  | -0.52308800 | -1.30944500 |
| H     | 4.36402400  | 1.35817300  | -1.69581300 |
| H     | 6.23707900  | -0.19557500 | -1.74903000 |
| C     | -3.04365300 | -0.01438200 | -0.58793400 |
| C     | -2.87469800 | 1.27093600  | -0.02622800 |
| C     | -3.94751300 | 2.17563500  | 0.02667900  |
| C     | -5.36269000 | 0.57186800  | -1.07545700 |
| C     | -5.21864400 | 1.84066500  | -0.47242300 |
| H     | -3.75645500 | 3.15268800  | 0.44948500  |
| H     | -6.30545600 | 0.27624800  | -1.51829700 |
| C     | 1.97819500  | 1.95299600  | 0.59162800  |
| C     | 3.20166000  | 2.37859300  | 1.10687000  |
| C     | 0.81145400  | 2.45231900  | 1.21705300  |
| C     | 3.29761300  | 3.26522100  | 2.17494400  |
| H     | 4.11808900  | 1.99485200  | 0.67220700  |
| C     | 0.89990000  | 3.34837000  | 2.29429500  |
| C     | 2.14037800  | 3.78910500  | 2.78781000  |
| H     | 4.28243500  | 3.54169800  | 2.53023900  |

| Atoms | x           | y           | z           |
|-------|-------------|-------------|-------------|
| H     | -0.02657000 | 3.68162500  | 2.74221800  |
| C     | -0.48485700 | 2.04534100  | 0.78687700  |
| C     | 1.68063000  | 1.78895400  | -1.93640500 |
| C     | 1.80631300  | 3.17462900  | -2.04908800 |
| C     | 1.36550900  | 1.04603400  | -3.08332900 |
| C     | 1.61620200  | 3.80755100  | -3.28121500 |
| H     | 2.04465000  | 3.76373900  | -1.16981500 |
| C     | 1.16955400  | 1.67413100  | -4.30952500 |
| H     | 1.27074100  | -0.03317400 | -3.00620700 |
| C     | 1.29529200  | 3.06259200  | -4.41392500 |
| H     | 1.71670100  | 4.88766500  | -3.34998600 |
| H     | 0.91962200  | 1.07961900  | -5.18457300 |
| H     | 1.14353200  | 3.55594400  | -5.37015500 |
| N     | 6.22233100  | -2.74349000 | -0.85459900 |
| N     | 2.21992800  | 4.70558900  | 3.83433000  |
| N     | -2.08320100 | -4.92555200 | 3.66226700  |
| N     | -6.28948300 | 2.72719200  | -0.38079000 |
| C     | -6.01974900 | 4.10640100  | -0.01691900 |
| H     | -6.96354100 | 4.65390100  | 0.02561700  |
| H     | -5.56134200 | 4.16145400  | 0.97643200  |
| H     | -5.35143000 | 4.61773300  | -0.72927700 |
| C     | -7.47511600 | 2.46896800  | -1.17766500 |
| H     | -7.27053900 | 2.44601800  | -2.26082500 |
| H     | -7.93027400 | 1.51240200  | -0.89847700 |
| H     | -8.21140900 | 3.25126600  | -0.98247900 |
| C     | -3.33381200 | -5.14770400 | 4.36497300  |
| H     | -4.11391000 | -5.48338500 | 3.67296100  |
| H     | -3.19015900 | -5.93788100 | 5.10474500  |
| H     | -3.70298100 | -4.24759600 | 4.88390100  |
| C     | -0.85619700 | -5.24000900 | 4.37159500  |
| H     | -0.09856100 | -5.62737700 | 3.68172500  |
| H     | -0.42635500 | -4.37061400 | 4.89595300  |
| H     | -1.06082500 | -6.02090300 | 5.10689100  |
| C     | 3.49756100  | 4.89006800  | 4.49814600  |
| H     | 4.25067100  | 5.26191200  | 3.79479000  |
| H     | 3.38475400  | 5.63987800  | 5.28384800  |
| H     | 3.88489300  | 3.96370700  | 4.95383900  |

| Atoms | x           | y           | z           |
|-------|-------------|-------------|-------------|
| C     | 1.02224400  | 4.98237500  | 4.60673000  |
| H     | 0.23915900  | 5.40578600  | 3.96841300  |
| H     | 0.61122100  | 4.08659000  | 5.10085000  |
| H     | 1.25718700  | 5.72328500  | 5.37365300  |
| C     | 7.55275800  | -2.25245600 | -1.16282100 |
| H     | 8.25143400  | -3.09136600 | -1.15850500 |
| H     | 7.58198400  | -1.80567000 | -2.16299600 |
| H     | 7.91057300  | -1.49813600 | -0.44270200 |
| C     | 6.11773000  | -3.97492600 | -0.09369200 |
| H     | 5.99320100  | -3.80209500 | 0.98801400  |
| H     | 5.26873400  | -4.57498000 | -0.43978600 |
| H     | 7.02249100  | -4.56638200 | -0.24719800 |
| C     | -4.29563200 | -0.31808100 | -1.12365900 |
| H     | -4.43524000 | -1.27837100 | -1.61222500 |
| C     | -1.90390400 | -1.01811500 | -0.59447100 |
| H     | -0.98524700 | -0.44300000 | -0.45353600 |
| C     | -1.59556200 | 1.69218300  | 0.44161400  |
| C     | -1.76692700 | -1.69538300 | -1.95818700 |
| C     | -1.47045800 | -0.89058800 | -3.06754700 |
| C     | -1.92070200 | -3.06963500 | -2.14875900 |
| C     | -1.32000700 | -1.44747400 | -4.33391800 |
| H     | -1.35350200 | 0.18038100  | -2.92941700 |
| C     | -1.77659300 | -3.63089700 | -3.42116600 |
| H     | -2.14437200 | -3.70603900 | -1.29902500 |
| C     | -1.47382800 | -2.82496100 | -4.51657800 |
| H     | -1.08282000 | -0.80599700 | -5.17882200 |
| H     | -1.89805100 | -4.70322300 | -3.55086900 |
| H     | -1.35710100 | -3.26293000 | -5.50417200 |
| C     | 1.86589900  | 1.03515800  | -0.61883500 |
| H     | 0.95089800  | 0.45452000  | -0.47606400 |

**Table S20.** Calculation details of ( $S_a, S_a$ )-3.

|                           |                                                |
|---------------------------|------------------------------------------------|
| <b>Calculation Type</b>   | SCAN                                           |
| <b>Calculation Method</b> | B3LYP                                          |
| <b>Formula</b>            | C <sub>50</sub> H <sub>48</sub> N <sub>4</sub> |
| <b>Basis Set</b>          | 6-31G(d)                                       |

|                          |                |              |
|--------------------------|----------------|--------------|
| <b>Charge</b>            | 0              |              |
| <b>Spin</b>              | Singlet        |              |
| <b>Solvation</b>         | None           |              |
| <b>E(RB3LYP)</b>         | -2153.3718     | Hartree      |
| <b>RMS Gradient Norm</b> | 9.77E-05       | Hartree/Bohr |
| <b>Dipole Moment</b>     | Debye          |              |
| <b>Point Group</b>       | C <sub>1</sub> |              |
| <b>Molecular Mass</b>    | 704.3879       | amu          |

---

### 5.3 TD-DFT Calculations: Stimulated UV-Vis Spectra, Molecular Orbitals and Electronic Transitions

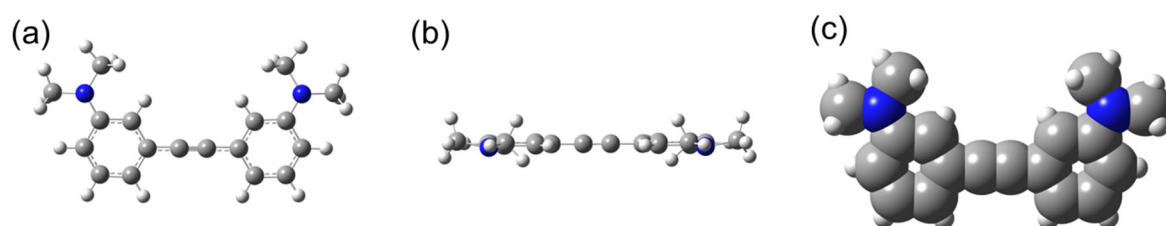

**Figure S8.** Optimized structure of **1**. (a) Top view, (b) Front view, and (c) Space-filling model (Top view).

**Table S21.** Atomic coordinate of optimized structure of **1** by TD-DFT, B3LYP/6-311++G(d,p).

| Atom | x           | y           | z           |
|------|-------------|-------------|-------------|
| C    | 4.14199900  | -0.20356400 | -0.04202500 |
| C    | 2.73437000  | -0.16975800 | -0.04251200 |
| C    | 2.03354100  | 1.04609800  | 0.00917800  |
| C    | 2.73775800  | 2.26194600  | 0.07358900  |
| C    | 4.12754000  | 2.23112000  | 0.08909000  |
| C    | 4.82846800  | 1.02893800  | 0.03809400  |
| H    | 2.15660100  | -1.08329300 | -0.08253900 |
| H    | 2.19309500  | 3.19844400  | 0.11639400  |
| H    | 4.68562400  | 3.16176800  | 0.14736800  |
| H    | 5.91059400  | 1.05358500  | 0.06067500  |
| C    | 0.60926100  | 1.03835700  | 0.00303300  |
| C    | -0.60626600 | 1.03447000  | -0.00215300 |
| C    | -2.03056800 | 1.03308500  | -0.00814400 |
| C    | -2.72312400 | -0.18724600 | -0.06556600 |
| C    | -2.74308800 | 2.24440000  | 0.05004300  |
| C    | -4.13045900 | -0.23007600 | -0.07703700 |
| H    | -2.13920100 | -1.09706900 | -0.10049900 |
| C    | -4.13272700 | 2.20466700  | 0.05372500  |
| H    | -2.20482400 | 3.18437700  | 0.09730400  |
| C    | -4.82547500 | 0.99800900  | -0.00299800 |
| H    | -4.69723900 | 3.13172600  | 0.10707100  |
| H    | -5.90789100 | 1.01571700  | 0.01036600  |
| N    | 4.83165200  | -1.40924500 | -0.12621900 |

| Atom | x           | y           | z           |
|------|-------------|-------------|-------------|
| N    | -4.81163000 | -1.44016700 | -0.16683900 |
| C    | 6.25565200  | -1.42188400 | 0.15421300  |
| H    | 6.49668900  | -1.07069000 | 1.17090800  |
| H    | 6.63071400  | -2.44119100 | 0.04436400  |
| H    | 6.79970300  | -0.79263600 | -0.55924500 |
| C    | 4.09759300  | -2.64869300 | 0.05175200  |
| H    | 4.78733200  | -3.48867100 | -0.05065300 |
| H    | 3.60628900  | -2.71931300 | 1.03595900  |
| H    | 3.32706000  | -2.75847100 | -0.71958400 |
| C    | -6.23783900 | -1.46190500 | 0.10154200  |
| H    | -6.60538100 | -2.48363800 | -0.01114800 |
| H    | -6.48970800 | -1.11199600 | 1.11604900  |
| H    | -6.77988300 | -0.83636300 | -0.61669000 |
| C    | -4.07115900 | -2.67486200 | 0.01750600  |
| H    | -4.75459900 | -3.51926100 | -0.09061200 |
| H    | -3.29344100 | -2.77974900 | -0.74727000 |
| H    | -3.58775200 | -2.74224200 | 1.00584200  |

**Table S22.** Calculation details of **1** by TD-DFT, B3LYP/6-311++G(d,p).

|                           |                                                |         |
|---------------------------|------------------------------------------------|---------|
| <b>Calculation Type</b>   | SP                                             |         |
| <b>Calculation Method</b> | RB3LYP TD-FC                                   |         |
| <b>Formula</b>            | C <sub>18</sub> H <sub>20</sub> N <sub>2</sub> |         |
| <b>Basis Set</b>          | 6-311++G(d,p)                                  |         |
| <b>Charge</b>             | 0                                              |         |
| <b>Spin</b>               | Singlet                                        |         |
| <b>Solvation</b>          | scrf=(iefpcm,solvent=dichloromethane)          |         |
| <b>E(TD-HF/TD-DFT)</b>    | -807.5644                                      | Hartree |
| <b>RMS Gradient Norm</b>  | Hartree/Bohr                                   |         |
| <b>Dipole Moment</b>      | 4.539598                                       | Debye   |
| <b>Point Group</b>        | C <sub>1</sub>                                 |         |
| <b>Molecular Mass</b>     | 264.1627                                       | amu     |

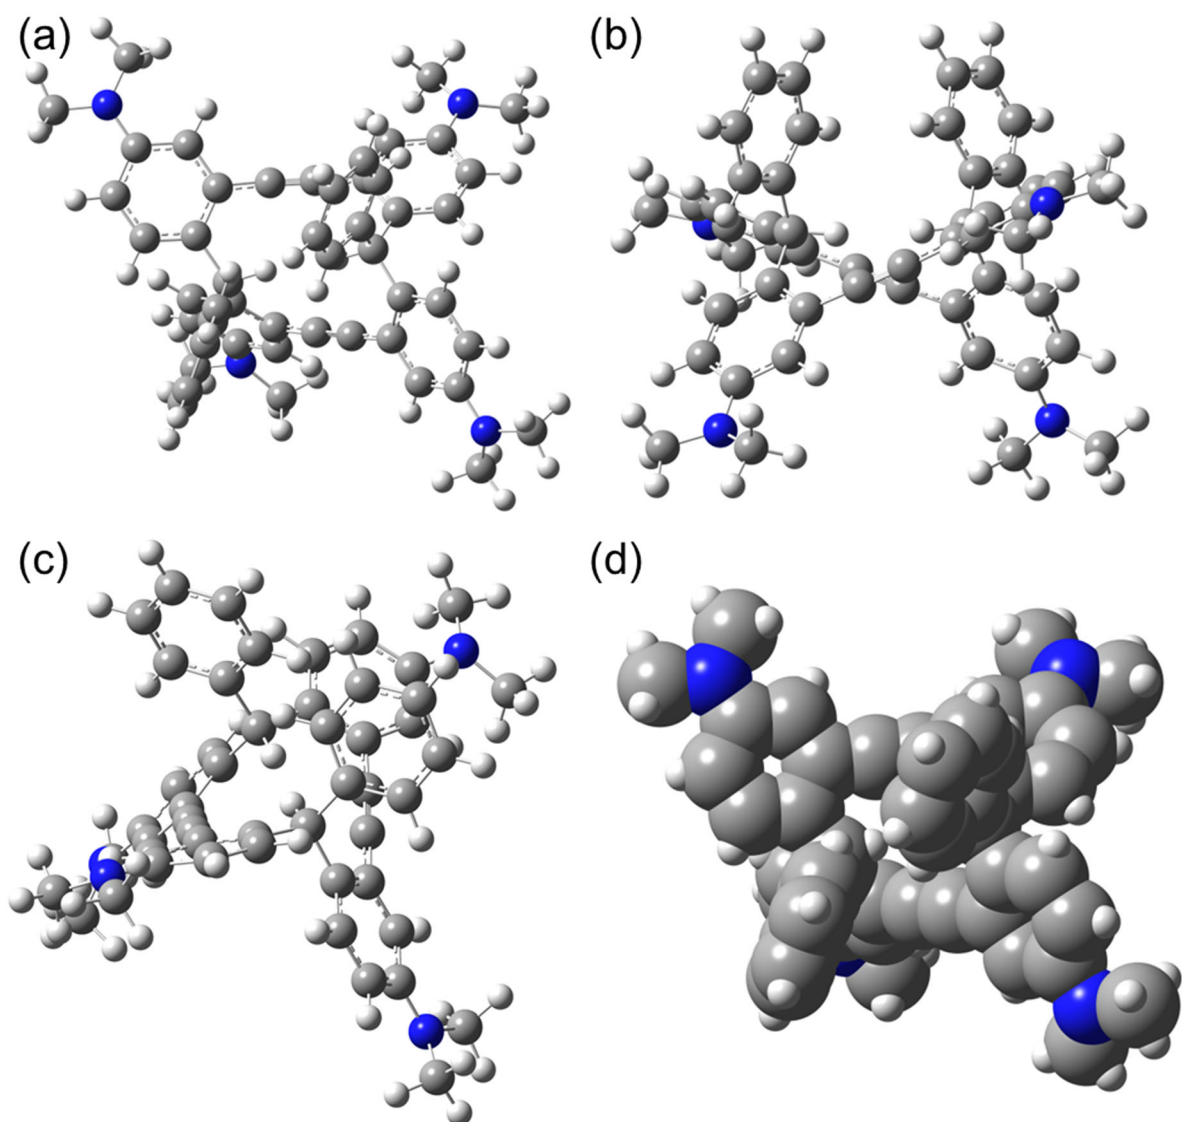

**Figure S9.** Optimized structure of (Ra,Ra)-3. (a) Top view, (b) Front view (c) Side view and (d) Space-filling model (Top view).

**Table S23.** Atomic coordinates and calculation details of optimized structure of (Ra,Ra)-3 by TD-DFT, B3LYP/6-311++G(d,p).

| Atom | x           | y           | z           |
|------|-------------|-------------|-------------|
| C    | -2.75253000 | -1.47517100 | -0.08575900 |
| C    | -2.97795200 | -0.22591600 | -0.70666900 |
| C    | -4.22037500 | -0.02395200 | -1.30710400 |
| C    | -5.22264300 | -0.98794500 | -1.28553700 |
| C    | -5.01087200 | -2.23683200 | -0.66186700 |
| C    | -3.75811500 | -2.45376100 | -0.06016500 |
| H    | -4.40841700 | 0.91790900  | -1.81481500 |

| Atom | x           | y           | z           |
|------|-------------|-------------|-------------|
| H    | -6.16781700 | -0.76534600 | -1.76467200 |
| H    | -3.53132400 | -3.39215100 | 0.42773700  |
| C    | -1.48552100 | -1.76297300 | 0.50103300  |
| C    | -0.37707400 | -1.97227200 | 0.95336800  |
| C    | 0.93164600  | -2.19546100 | 1.47175700  |
| C    | 1.06583600  | -2.90330500 | 2.67578500  |
| C    | 2.06930300  | -1.70343500 | 0.78924300  |
| C    | 2.32674900  | -3.15800900 | 3.24423000  |
| H    | 0.15928900  | -3.24020800 | 3.16027100  |
| C    | 3.31144800  | -1.94443900 | 1.37334300  |
| C    | 3.45293100  | -2.64534500 | 2.56726100  |
| H    | 4.20312600  | -1.55923000 | 0.89009500  |
| H    | 4.44828000  | -2.78450200 | 2.97031200  |
| C    | -2.05269100 | 1.79310200  | 0.51217100  |
| C    | -0.90735800 | 2.39126100  | 1.08862700  |
| C    | -1.02846800 | 3.30117700  | 2.14998400  |
| C    | -3.41829200 | 3.04767900  | 2.10099100  |
| C    | -2.28207500 | 3.64253100  | 2.68823600  |
| H    | -0.11765200 | 3.72739600  | 2.54860700  |
| H    | -4.41141800 | 3.27983300  | 2.46490200  |
| C    | 2.97689700  | 0.07606000  | -0.76967700 |
| C    | 4.21236800  | -0.22789600 | -1.34074600 |
| C    | 2.75764500  | 1.41390300  | -0.37094600 |
| C    | 5.21369600  | 0.72437500  | -1.49812900 |
| H    | 4.39550500  | -1.24374400 | -1.67945900 |
| C    | 3.76226800  | 2.38136300  | -0.52712200 |
| C    | 5.00784700  | 2.06255200  | -1.09751800 |
| H    | 6.15342900  | 0.42129900  | -1.94255700 |
| H    | 3.54029900  | 3.39015300  | -0.20594700 |
| C    | 1.49783100  | 1.79939500  | 0.17384000  |
| C    | 1.78690400  | -1.92330500 | -1.73837400 |
| C    | 1.40067700  | -1.37715000 | -2.97111700 |
| C    | 2.03282700  | -3.29486800 | -1.66034700 |
| C    | 1.25160900  | -2.18461100 | -4.09462400 |
| H    | 1.21754700  | -0.30855000 | -3.04192500 |
| C    | 1.88986000  | -4.10756900 | -2.78904400 |
| H    | 2.32711500  | -3.73221600 | -0.71201200 |



| Atom | x           | y           | z           |
|------|-------------|-------------|-------------|
| C    | 1.49670900  | -3.55835000 | -4.00748800 |
| H    | 0.94464100  | -1.74311700 | -5.03939100 |
| H    | 2.08354000  | -5.17417100 | -2.70959900 |
| H    | 1.38083200  | -4.19174100 | -4.88277100 |
| N    | 2.45496300  | -3.89003500 | 4.42307100  |
| N    | 5.98955300  | 3.03348000  | -1.27837700 |
| N    | -5.99377900 | -3.22315400 | -0.66007400 |
| N    | -2.39308900 | 4.51966000  | 3.76488600  |
| C    | -1.23167200 | 5.30232200  | 4.14598800  |
| H    | -1.48944800 | 5.92700800  | 5.00363500  |
| H    | -0.40645300 | 4.64910000  | 4.45004400  |
| H    | -0.86754100 | 5.95551200  | 3.33570000  |
| C    | -3.70027500 | 5.06282900  | 4.08506100  |
| H    | -4.14611500 | 5.63263400  | 3.25292400  |
| H    | -4.39745700 | 4.26324200  | 4.35903100  |
| H    | -3.60815800 | 5.72676300  | 4.94697100  |
| C    | -7.34725500 | -2.85765800 | -1.03491100 |
| H    | -7.38178700 | -2.49723700 | -2.06916100 |
| H    | -7.98414300 | -3.74240800 | -0.97504400 |
| H    | -7.77697800 | -2.07536100 | -0.38755500 |
| C    | -5.82324800 | -4.37407000 | 0.20754800  |
| H    | -4.92298200 | -4.93603100 | -0.06482300 |
| H    | -5.74448800 | -4.10134600 | 1.27288600  |
| H    | -6.67771800 | -5.04244900 | 0.08432700  |
| C    | 7.33872700  | 2.60724700  | -1.60097800 |
| H    | 7.36079000  | 2.07339700  | -2.55766500 |
| H    | 7.97537600  | 3.48832300  | -1.70286800 |
| H    | 7.77722700  | 1.94815200  | -0.83349000 |
| C    | 5.82857000  | 4.31681500  | -0.62000700 |
| H    | 4.92449700  | 4.82454000  | -0.97408100 |
| H    | 5.76305800  | 4.23183200  | 0.47729100  |
| H    | 6.68083600  | 4.95299000  | -0.86692200 |
| C    | 3.72877400  | -3.86513300 | 5.11855800  |
| H    | 3.65789300  | -4.48828100 | 6.01239400  |
| H    | 4.52301700  | -4.28191800 | 4.48954400  |
| H    | 4.03364800  | -2.85058200 | 5.42451700  |
| C    | 1.26634100  | -4.13555400 | 5.21981900  |

| Atom | x           | y           | z           |
|------|-------------|-------------|-------------|
| H    | 0.77644400  | -3.20840500 | 5.56017500  |
| H    | 0.53222000  | -4.71687200 | 4.65139900  |
| H    | 1.54210400  | -4.72347300 | 6.09767900  |
| C    | -3.28955100 | 2.14621100  | 1.04875100  |
| H    | -4.18823300 | 1.70000000  | 0.63603300  |
| C    | -1.91039300 | 0.85376300  | -0.67772300 |
| H    | -0.95665300 | 0.33829100  | -0.54201700 |
| C    | 0.39505700  | 2.08364800  | 0.59831500  |
| C    | -1.80160000 | 1.57593800  | -2.01944600 |
| C    | -2.04461000 | 2.94140700  | -2.17481100 |
| C    | -1.43290300 | 0.82498500  | -3.14519700 |
| C    | -1.91609100 | 3.54783900  | -3.42804700 |
| H    | -2.32554100 | 3.53589900  | -1.31176800 |
| C    | -1.29823600 | 1.42709200  | -4.39251500 |
| H    | -1.25202900 | -0.24052700 | -3.03384500 |
| C    | -1.54040300 | 2.79627000  | -4.53925800 |
| H    | -2.10735000 | 4.61294500  | -3.53041700 |
| H    | -1.00475900 | 0.82890100  | -5.25143500 |
| H    | -1.43579200 | 3.26960700  | -5.51174500 |
| C    | 1.91126700  | -0.98157100 | -0.54202700 |
| H    | 0.95852100  | -0.44970300 | -0.48485800 |

**Table S24.** Calculation details of optimized structure of ( $R_a,R_a$ )-**3** by TD-DFT, B3LYP/6-311++G(d,p).

|                           |                                                |              |
|---------------------------|------------------------------------------------|--------------|
| <b>Calculation Type</b>   | SP                                             |              |
| <b>Calculation Method</b> | RB3LYP TD-FC                                   |              |
| <b>Formula</b>            | C <sub>50</sub> H <sub>48</sub> N <sub>4</sub> |              |
| <b>Basis Set</b>          | 6-311++G(d,p)                                  |              |
| <b>Charge</b>             | 0                                              |              |
| <b>Spin</b>               | Singlet                                        |              |
| <b>Solvation</b>          | scrf=(iefpcm,solvent=dichloromethane)          |              |
| <b>E(TD-HF/TD-DFT)</b>    | -2153.801880                                   | Hartree      |
| <b>RMS Gradient Norm</b>  |                                                | Hartree/Bohr |
| <b>Dipole Moment</b>      | 4.930748                                       | Debye        |
| <b>Point Group</b>        | C <sub>1</sub>                                 |              |
| <b>Molecular Mass</b>     | 704.387898                                     | amu          |

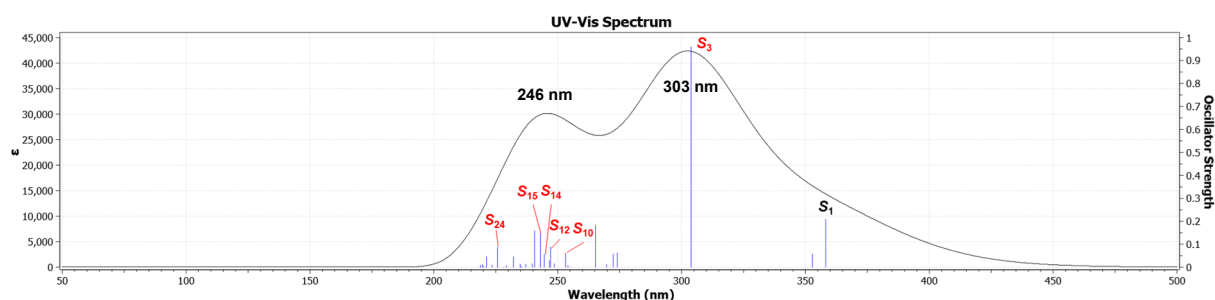

**Figure S10.** Simulated UV-Vis spectrum of **1** by TD-DFT calculation (red words: electronic transition with  $f > 0.05$  from HOMO-2).

**Table S25.** Selected electronic transitions for **1** (listed excited states are related to HOMO-2 except excited state 1).

| Excited State | Nature   | Excitation energies | Wavelength | f         |        |
|---------------|----------|---------------------|------------|-----------|--------|
| 1             | 71 -> 72 | 0.69463             | 3.4615 eV  | 358.18 nm | 0.2087 |
| 3             | 69 -> 72 | 0.68778             | 4.0801 eV  | 303.88 nm | 0.9596 |
|               | 69 -> 73 | -0.12361            |            |           |        |
|               | 70 -> 75 | 0.56548             |            |           |        |
| 10            | 71 -> 73 | -0.19057            | 4.8974 eV  | 253.16 nm | 0.0606 |
|               | 71 -> 74 | 0.18950             |            |           |        |
|               | 71 -> 77 | -0.19536            |            |           |        |
|               | 71 -> 79 | 0.18686             |            |           |        |
|               | 69 -> 73 | 0.11350             |            |           |        |
|               | 70 -> 76 | -0.30374            |            |           |        |
|               | 70 -> 80 | -0.18487            |            |           |        |
| 12            | 71 -> 74 | 0.11311             | 5.0177 eV  | 247.09 nm | 0.0876 |
|               | 71 -> 77 | 0.43410             |            |           |        |
|               | 71 -> 78 | 0.32805             |            |           |        |
|               | 71 -> 79 | 0.17920             |            |           |        |
|               | 69 -> 74 | -0.15712            |            |           |        |
|               | 70 -> 75 | 0.24594             |            |           |        |
| 13            | 70 -> 76 | 0.49378             | 5.0272 eV  | 246.62 nm | 0.0283 |
|               | 71 -> 77 | 0.24827             |            |           |        |
|               | 71 -> 78 | 0.17858             |            |           |        |
|               | 71 -> 79 | -0.21390            |            |           |        |
|               | 69 -> 75 | 0.13439             |            |           |        |
| 14            | 70 -> 77 | 0.57290             | 5.0694 eV  | 244.58 nm | 0.0540 |
|               | 70 -> 78 | 0.23442             |            |           |        |
|               | 71 -> 80 | -0.27752            |            |           |        |

| Excited State | Nature   | Excitation energies | Wavelength | f         |        |
|---------------|----------|---------------------|------------|-----------|--------|
| 15            | 69 -> 74 | -0.13289            | 5.1017 eV  | 243.02 nm | 0.1443 |
|               | 70 -> 80 | -0.13705            |            |           |        |
|               | 71 -> 77 | -0.40876            |            |           |        |
|               | 71 -> 78 | 0.50921             |            |           |        |
| 17            | 68 -> 72 | 0.35881             | 5.1712 eV  | 239.76 nm | 0.0154 |
|               | 69 -> 73 | 0.54649             |            |           |        |
|               | 69 -> 74 | 0.16240             |            |           |        |
| 18            | 68 -> 72 | -0.12325            | 5.2300 eV  | 237.06 nm | 0.0124 |
|               | 69 -> 73 | 0.13850             |            |           |        |
|               | 69 -> 74 | -0.39109            |            |           |        |
|               | 70 -> 76 | 0.15565             |            |           |        |
|               | 70 -> 81 | -0.14789            |            |           |        |
|               | 71 -> 78 | -0.16927            |            |           |        |
| 19            | 71 -> 79 | 0.45972             | 5.2694 eV  | 235.29 nm | 0.0035 |
|               | 68 -> 72 | 0.10606             |            |           |        |
|               | 69 -> 73 | -0.22045            |            |           |        |
|               | 69 -> 74 | 0.43344             |            |           |        |
|               | 69 -> 79 | 0.10414             |            |           |        |
|               | 70 -> 75 | -0.10748            |            |           |        |
|               | 70 -> 76 | 0.25370             |            |           |        |
| 20            | 71 -> 74 | -0.10268            | 5.2792 eV  | 234.85 nm | 0.0141 |
|               | 71 -> 79 | 0.34939             |            |           |        |
|               | 69 -> 76 | 0.13910             |            |           |        |
|               | 70 -> 74 | -0.12873            |            |           |        |
|               | 70 -> 79 | 0.59302             |            |           |        |
|               | 71 -> 75 | -0.10949            |            |           |        |
| 21            | 71 -> 76 | 0.15320             | 5.3414 eV  | 232.12 nm | 0.0463 |
|               | 71 -> 81 | -0.23334            |            |           |        |
|               | 66 -> 72 | 0.27569             |            |           |        |
|               | 69 -> 75 | 0.54972             |            |           |        |
|               | 69 -> 76 | 0.17203             |            |           |        |
|               | 70 -> 77 | -0.18847            |            |           |        |
| 22            | 70 -> 79 | -0.11747            | 5.4062 eV  | 229.34 nm | 0.0067 |
|               | 71 -> 76 | -0.10302            |            |           |        |
|               | 71 -> 80 | -0.10389            |            |           |        |
|               | 69 -> 76 | 0.13207             |            |           |        |
|               | 70 -> 77 | 0.10257             |            |           |        |

| Excited State | Nature   | Excitation energies | Wavelength | f         |        |
|---------------|----------|---------------------|------------|-----------|--------|
|               | 70 -> 78 | 0.34866             |            |           |        |
|               | 70 -> 82 | -0.15332            |            |           |        |
|               | 71 -> 80 | 0.54712             |            |           |        |
|               | 68 -> 72 | 0.40430             |            |           |        |
|               | 69 -> 73 | -0.21547            |            |           |        |
| 24            | 69 -> 74 | -0.15457            | 5.4951 eV  | 225.63 nm | 0.0860 |
|               | 69 -> 77 | 0.43114             |            |           |        |
|               | 69 -> 78 | -0.11689            |            |           |        |
|               | 71 -> 83 | 0.14822             |            |           |        |
|               | 66 -> 72 | 0.17549             |            |           |        |
| 25            | 69 -> 75 | -0.31017            | 5.5480 eV  | 223.48 nm | 0.0083 |
|               | 69 -> 76 | 0.56873             |            |           |        |
|               | 71 -> 80 | -0.10418            |            |           |        |
|               | 65 -> 72 | -0.14711            |            |           |        |
|               | 69 -> 77 | -0.26941            |            |           |        |
| 26            | 70 -> 85 | -0.28725            | 5.6041 eV  | 221.24 nm | 0.0467 |
|               | 70 -> 86 | -0.15078            |            |           |        |
|               | 71 -> 82 | -0.16961            |            |           |        |
|               | 71 -> 83 | 0.48875             |            |           |        |
|               | 66 -> 72 | 0.14496             |            |           |        |
|               | 69 -> 76 | -0.11329            |            |           |        |
|               | 70 -> 79 | 0.12448             |            |           |        |
|               | 70 -> 82 | -0.22751            |            |           |        |
| 27            | 70 -> 83 | 0.35756             | 5.6178 eV  | 220.70 nm | 0.0001 |
|               | 70 -> 88 | -0.11513            |            |           |        |
|               | 71 -> 81 | 0.36061             |            |           |        |
|               | 71 -> 85 | -0.28788            |            |           |        |
|               | 71 -> 86 | -0.15703            |            |           |        |
|               | 66 -> 72 | -0.15160            |            |           |        |
|               | 69 -> 76 | 0.10083             |            |           |        |
|               | 70 -> 79 | 0.15667             |            |           |        |
|               | 70 -> 82 | -0.12280            |            |           |        |
| 28            | 70 -> 83 | -0.32126            | 5.6392 eV  | 219.86 nm | 0.0056 |
|               | 70 -> 84 | 0.18399             |            |           |        |
|               | 71 -> 81 | 0.45213             |            |           |        |
|               | 71 -> 85 | 0.16015             |            |           |        |
|               | 71 -> 86 | 0.19379             |            |           |        |

#72 LUMO, #71 HOMO, #70 HOMO-1, #69 HOMO-2

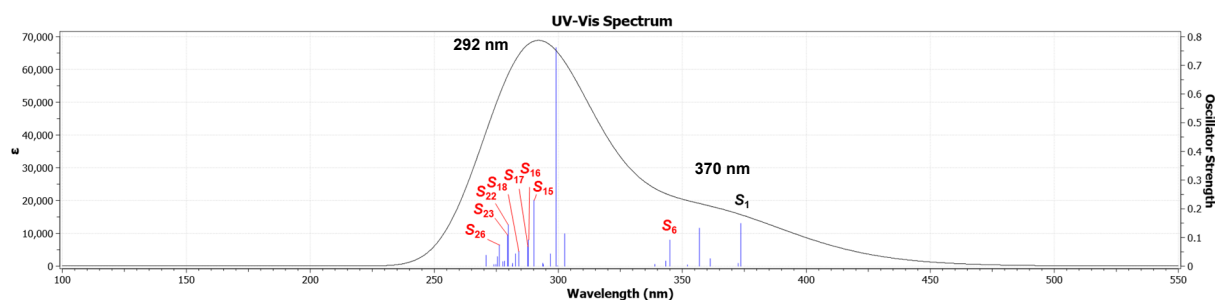

**Figure S11.** Simulated UV-Vis spectra of  $(R_a,R_a)$ -**3** by TD-DFT calculation (red words: electronic transition with  $f > 0.05$  from HOMO-2).

**Table S26.** Selected electronic transitions for  $(R_a,R_a)$ -**3** (listed excited states are related to HOMO-2 except excited state 1).

| Excited State | Nature     | Excitation Energies | Wavelength | f         |        |
|---------------|------------|---------------------|------------|-----------|--------|
| 1             | 188 -> 189 | 0.69699             | 3.3185 eV  | 373.62 nm | 0.1489 |
| 2             | 186 -> 189 | -0.13445            | 3.3282 eV  | 372.53 nm | 0.0098 |
|               | 188 -> 190 | 0.68712             |            |           |        |
| 5             | 186 -> 189 | 0.68559             | 3.5207 eV  | 352.16 nm | 0.0047 |
|               | 188 -> 190 | 0.13583             |            |           |        |
| 6             | 185 -> 189 | 0.38656             | 3.5938 eV  | 344.99 nm | 0.0912 |
|               | 186 -> 190 | 0.58181             |            |           |        |
| 7             | 185 -> 189 | 0.55068             | 3.6113 eV  | 343.33 nm | 0.0180 |
|               | 186 -> 190 | -0.37654            |            |           |        |
|               | 187 -> 190 | 0.21326             |            |           |        |
| 15            | 184 -> 190 | 0.20320             | 4.2729 eV  | 290.17 nm | 0.2298 |
|               | 186 -> 191 | -0.20936            |            |           |        |
|               | 187 -> 191 | 0.53998             |            |           |        |
|               | 188 -> 192 | -0.10142            |            |           |        |
| 16            | 188 -> 193 | -0.24540            | 4.3071 eV  | 287.86 nm | 0.0915 |
|               | 186 -> 191 | 0.37505             |            |           |        |
|               | 187 -> 191 | 0.27775             |            |           |        |
|               | 187 -> 192 | 0.24307             |            |           |        |
|               | 188 -> 192 | -0.11357            |            |           |        |
| 17            | 188 -> 193 | 0.33437             | 4.3097 eV  | 287.69 nm | 0.0689 |
|               | 188 -> 196 | -0.10073            |            |           |        |
|               | 188 -> 197 | 0.12604             |            |           |        |
| 17            | 186 -> 191 | 0.37505             | 4.3097 eV  | 287.69 nm | 0.0689 |
|               | 187 -> 191 | 0.27775             |            |           |        |

|       |            |          |           |           |        |
|-------|------------|----------|-----------|-----------|--------|
|       | 187 -> 192 | 0.24307  |           |           |        |
|       | 188 -> 192 | -0.11357 |           |           |        |
|       | 188 -> 193 | 0.33437  |           |           |        |
|       | 188 -> 196 | -0.10073 |           |           |        |
|       | 188 -> 197 | 0.12604  |           |           |        |
| <hr/> |            |          |           |           |        |
|       | 183 -> 190 | 0.11035  |           |           |        |
|       | 185 -> 191 | 0.31550  |           |           |        |
|       | 186 -> 192 | 0.30394  |           |           |        |
| 18    | 187 -> 193 | 0.20939  | 4.3643 eV | 284.09 nm | 0.0516 |
|       | 187 -> 196 | -0.13592 |           |           |        |
|       | 188 -> 194 | 0.28048  |           |           |        |
|       | 188 -> 195 | -0.26686 |           |           |        |
| <hr/> |            |          |           |           |        |
|       | 185 -> 191 | -0.25387 |           |           |        |
|       | 186 -> 192 | -0.13904 |           |           |        |
|       | 187 -> 193 | -0.11654 |           |           |        |
| 19    | 187 -> 195 | -0.11281 | 4.3856 eV | 282.71 nm | 0.0432 |
|       | 187 -> 199 | -0.15621 |           |           |        |
|       | 188 -> 194 | 0.43153  |           |           |        |
|       | 188 -> 196 | -0.18429 |           |           |        |
|       | 188 -> 197 | -0.21991 |           |           |        |
| <hr/> |            |          |           |           |        |
|       | 186 -> 191 | -0.28473 |           |           |        |
|       | 186 -> 192 | 0.31548  |           |           |        |
| 20    | 187 -> 196 | 0.15849  | 4.4036 eV | 281.55 nm | 0.0101 |
|       | 188 -> 193 | 0.32202  |           |           |        |
|       | 188 -> 195 | 0.35074  |           |           |        |
|       | 188 -> 197 | -0.11323 |           |           |        |
| <hr/> |            |          |           |           |        |
|       | 185 -> 191 | -0.12333 |           |           |        |
|       | 186 -> 191 | -0.34663 |           |           |        |
| 21    | 186 -> 192 | -0.27771 | 4.4051 eV | 281.46 nm | 0.0034 |
|       | 187 -> 194 | 0.14667  |           |           |        |
|       | 188 -> 193 | 0.36774  |           |           |        |
|       | 188 -> 195 | -0.27467 |           |           |        |
| <hr/> |            |          |           |           |        |
|       | 185 -> 198 | -0.10670 |           |           |        |
|       | 186 -> 191 | 0.10636  |           |           |        |
| 22    | 186 -> 192 | -0.20116 | 4.4300 eV | 279.87 nm | 0.1445 |
|       | 187 -> 192 | -0.10401 |           |           |        |
|       | 187 -> 194 | -0.32103 |           |           |        |
|       | 187 -> 195 | 0.18707  |           |           |        |



|       |            |          |           |           |        |
|-------|------------|----------|-----------|-----------|--------|
|       | 188 -> 193 | 0.14304  |           |           |        |
|       | 188 -> 194 | 0.11368  |           |           |        |
|       | 188 -> 196 | 0.33996  |           |           |        |
|       | 188 -> 197 | -0.16501 |           |           |        |
|       | 188 -> 198 | -0.13547 |           |           |        |
|       | 188 -> 199 | 0.14571  |           |           |        |
| <hr/> |            |          |           |           |        |
|       | 185 -> 191 | -0.25968 |           |           |        |
|       | 185 -> 194 | 0.10245  |           |           |        |
|       | 186 -> 191 | 0.11672  |           |           |        |
|       | 186 -> 192 | 0.24295  |           |           |        |
| 23    | 187 -> 193 | -0.12434 | 4.4355 eV | 279.53 nm | 0.1091 |
|       | 187 -> 194 | 0.19129  |           |           |        |
|       | 187 -> 195 | 0.17164  |           |           |        |
|       | 187 -> 197 | -0.16462 |           |           |        |
|       | 188 -> 196 | 0.39324  |           |           |        |
|       | 188 -> 199 | -0.10191 |           |           |        |
| <hr/> |            |          |           |           |        |
|       | 185 -> 191 | 0.18521  |           |           |        |
|       | 185 -> 192 | 0.15547  |           |           |        |
|       | 185 -> 198 | 0.10738  |           |           |        |
|       | 186 -> 192 | -0.23089 |           |           |        |
|       | 186 -> 194 | 0.13380  |           |           |        |
|       | 187 -> 192 | -0.14336 |           |           |        |
| 24    | 187 -> 193 | 0.27316  | 4.4548 eV | 278.32 nm | 0.0177 |
|       | 187 -> 194 | 0.18095  |           |           |        |
|       | 187 -> 197 | -0.11792 |           |           |        |
|       | 188 -> 195 | 0.29786  |           |           |        |
|       | 188 -> 196 | 0.10140  |           |           |        |
|       | 188 -> 198 | 0.20286  |           |           |        |
|       | 188 -> 199 | -0.12639 |           |           |        |
| <hr/> |            |          |           |           |        |
|       | 185 -> 191 | -0.13858 |           |           |        |
|       | 185 -> 192 | -0.17798 |           |           |        |
|       | 186 -> 193 | -0.10198 |           |           |        |
|       | 186 -> 194 | -0.11217 |           |           |        |
| 25    | 187 -> 192 | -0.21478 | 4.4651 eV | 277.67 nm | 0.0160 |
|       | 188 -> 194 | 0.20278  |           |           |        |
|       | 188 -> 195 | 0.19265  |           |           |        |
|       | 188 -> 197 | 0.46264  |           |           |        |
|       | 188 -> 198 | -0.11515 |           |           |        |

|            |            |          |           |           |        |  |
|------------|------------|----------|-----------|-----------|--------|--|
| <hr/>      |            |          |           |           |        |  |
| 26         | 185 -> 192 | 0.29655  | 4.4884 eV | 276.23 nm | 0.0746 |  |
|            | 185 -> 199 | -0.12718 |           |           |        |  |
|            | 186 -> 194 | 0.28254  |           |           |        |  |
|            | 187 -> 194 | -0.12164 |           |           |        |  |
|            | 187 -> 197 | 0.15639  |           |           |        |  |
|            | 187 -> 200 | 0.11739  |           |           |        |  |
|            | 188 -> 195 | -0.10344 |           |           |        |  |
|            | 188 -> 197 | 0.22531  |           |           |        |  |
|            | 188 -> 198 | 0.15606  |           |           |        |  |
|            | 188 -> 199 | 0.30453  |           |           |        |  |
| <hr/>      |            |          |           |           |        |  |
| 27         | 185 -> 192 | 0.45469  | 4.5002 eV | 275.51 nm | 0.0335 |  |
|            | 185 -> 194 | -0.14122 |           |           |        |  |
|            | 186 -> 191 | -0.12705 |           |           |        |  |
|            | 186 -> 195 | 0.17076  |           |           |        |  |
|            | 186 -> 197 | 0.14495  |           |           |        |  |
|            | 187 -> 198 | -0.11715 |           |           |        |  |
|            | 187 -> 200 | -0.11353 |           |           |        |  |
|            | 188 -> 198 | -0.20384 |           |           |        |  |
|            | 188 -> 199 | -0.13955 |           |           |        |  |
|            | 188 -> 200 | -0.13641 |           |           |        |  |
| <hr/>      |            |          |           |           |        |  |
| 28         | 182 -> 190 | -0.10156 | 4.5112 eV | 274.84 nm | 0.0062 |  |
|            | 185 -> 191 | -0.15366 |           |           |        |  |
|            | 185 -> 192 | 0.20158  |           |           |        |  |
|            | 185 -> 194 | 0.21601  |           |           |        |  |
|            | 186 -> 193 | 0.20758  |           |           |        |  |
|            | 186 -> 194 | -0.11559 |           |           |        |  |
|            | 186 -> 197 | 0.13708  |           |           |        |  |
|            | 186 -> 198 | 0.10666  |           |           |        |  |
|            | 186 -> 199 | -0.10529 |           |           |        |  |
|            | 187 -> 193 | 0.14069  |           |           |        |  |
|            | 187 -> 198 | 0.19151  |           |           |        |  |
|            | 187 -> 199 | 0.10994  |           |           |        |  |
|            | 188 -> 196 | -0.14660 |           |           |        |  |
| 188 -> 200 | 0.28092    |          |           |           |        |  |
| <hr/>      |            |          |           |           |        |  |
| 29         | 185 -> 191 | -0.34728 | 4.5242 eV | 274.04 nm | 0.0058 |  |
|            | 185 -> 194 | -0.12797 |           |           |        |  |
|            | 186 -> 192 | 0.11293  |           |           |        |  |
|            | 186 -> 193 | 0.15867  |           |           |        |  |

|       |            |          |           |           |        |
|-------|------------|----------|-----------|-----------|--------|
|       | 187 -> 193 | 0.42873  |           |           |        |
|       | 187 -> 194 | -0.11077 |           |           |        |
|       | 187 -> 198 | -0.12035 |           |           |        |
|       | 188 -> 200 | -0.11267 |           |           |        |
|       | 188 -> 202 | 0.10997  |           |           |        |
| ----- |            |          |           |           |        |
|       | 182 -> 189 | 0.19891  |           |           |        |
|       | 185 -> 193 | -0.17058 |           |           |        |
|       | 186 -> 194 | -0.15949 |           |           |        |
| 30    | 187 -> 194 | 0.30345  | 4.5767 eV | 270.90 nm | 0.0381 |
|       | 187 -> 195 | 0.23053  |           |           |        |
|       | 187 -> 196 | 0.11295  |           |           |        |
|       | 187 -> 197 | 0.37912  |           |           |        |

---

#189 LUMO, #188 HOMO, #187 HOMO-1, #186 HOMO-2

## 6. NMR Spectra

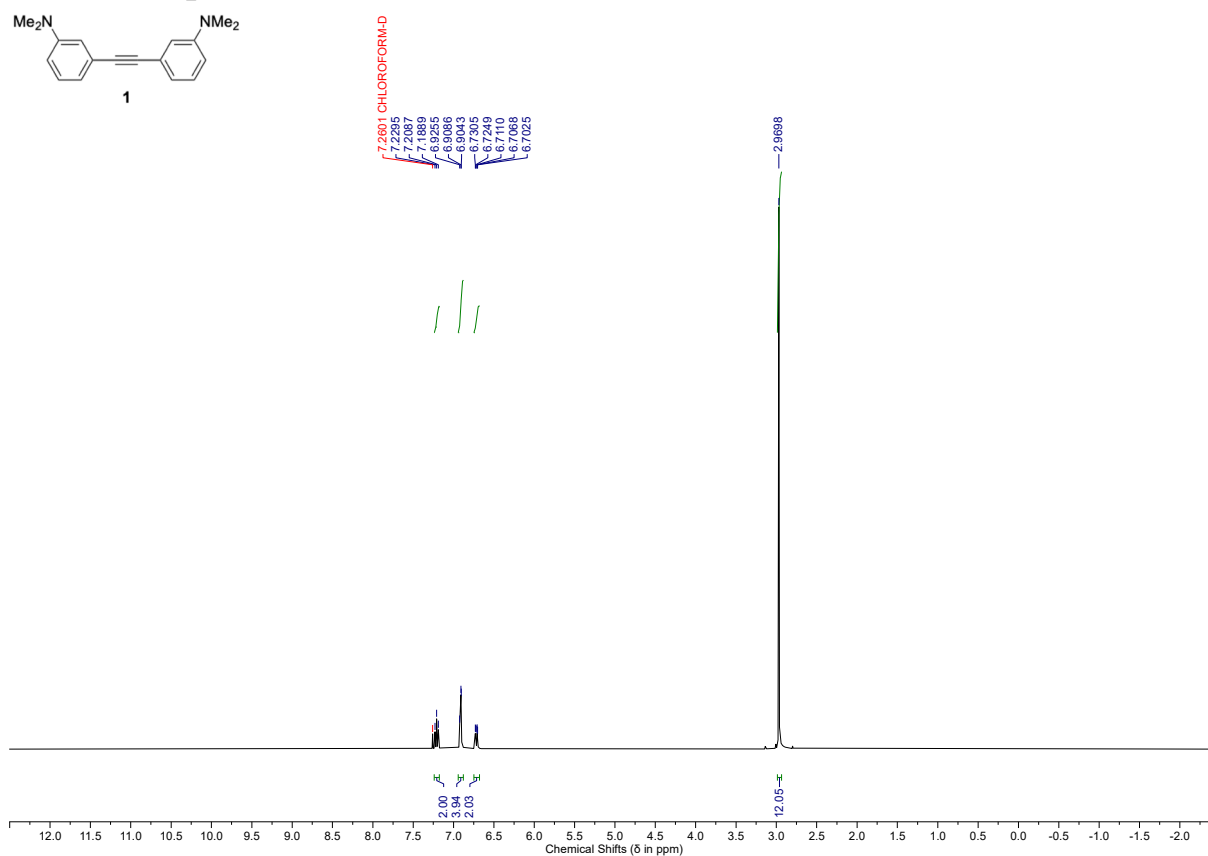

**Figure S12.**  $^1\text{H}$  NMR ( $\text{CDCl}_3$ , 400 MHz): 3,3'-(Ethyne-1,2-diyl)bis(*N,N*-dimethylaniline) (**1**).

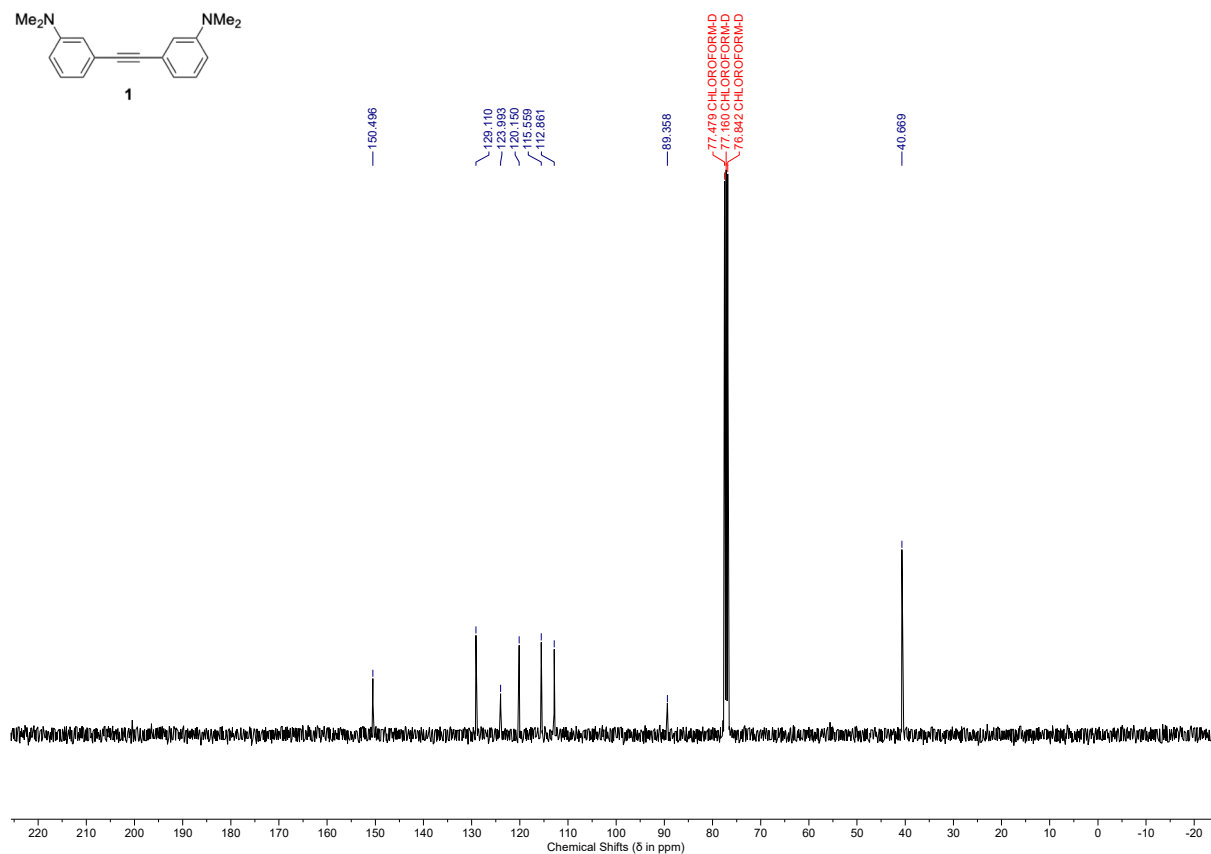

**Figure S13.**  $^{13}\text{C}$  NMR ( $\text{CDCl}_3$ , 100 MHz): 3,3'-(Ethyne-1,2-diyl)bis(*N,N*-dimethylaniline) (**1**).

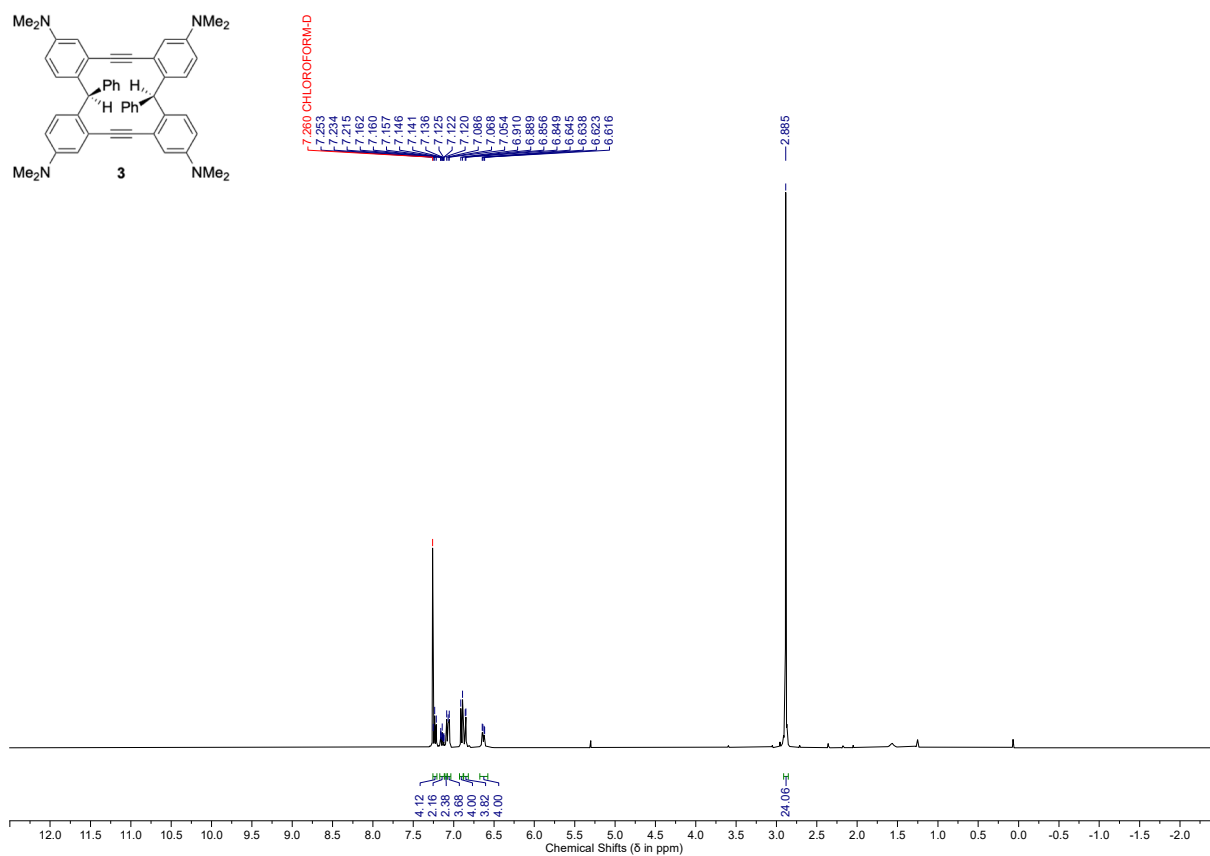

**Figure S14.**  $^1\text{H}$  NMR ( $\text{CDCl}_3$ , 400 MHz): Twisted macrocycle **3**.

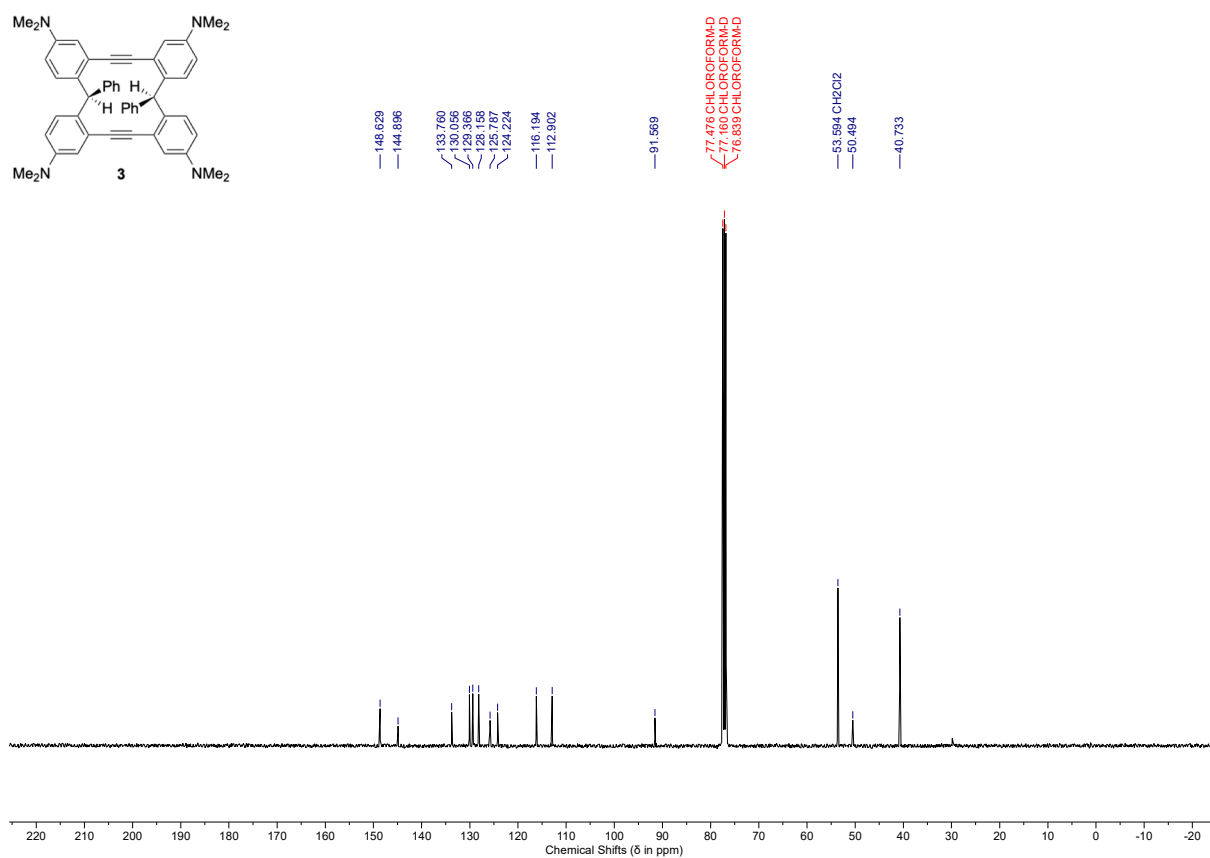

**Figure S15.**  $^{13}\text{C}$  NMR ( $\text{CDCl}_3$ , 100 MHz): Twisted macrocycle **3**.

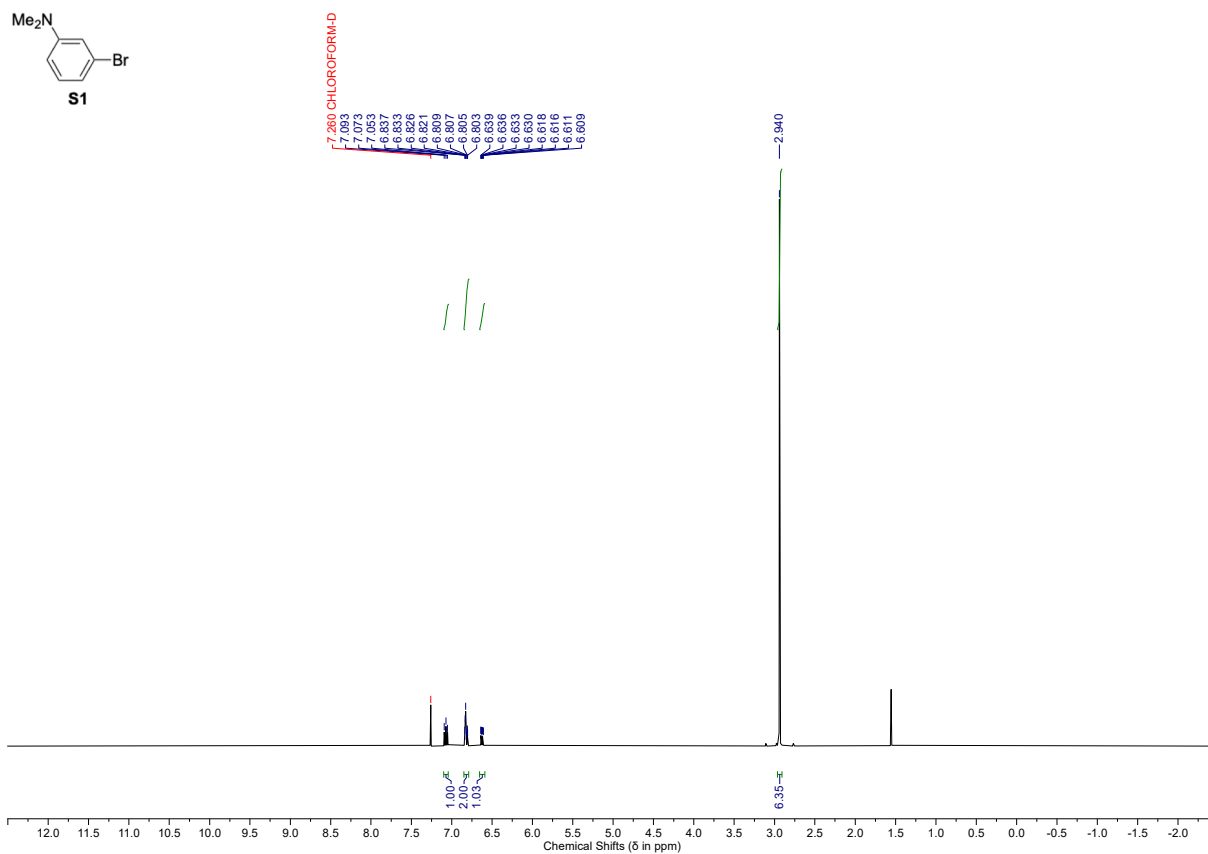

**Figure S16.**  $^1\text{H}$  NMR ( $\text{CDCl}_3$ , 400 MHz): 3-Bromo-*N,N*-dimethylaniline (**S1**).

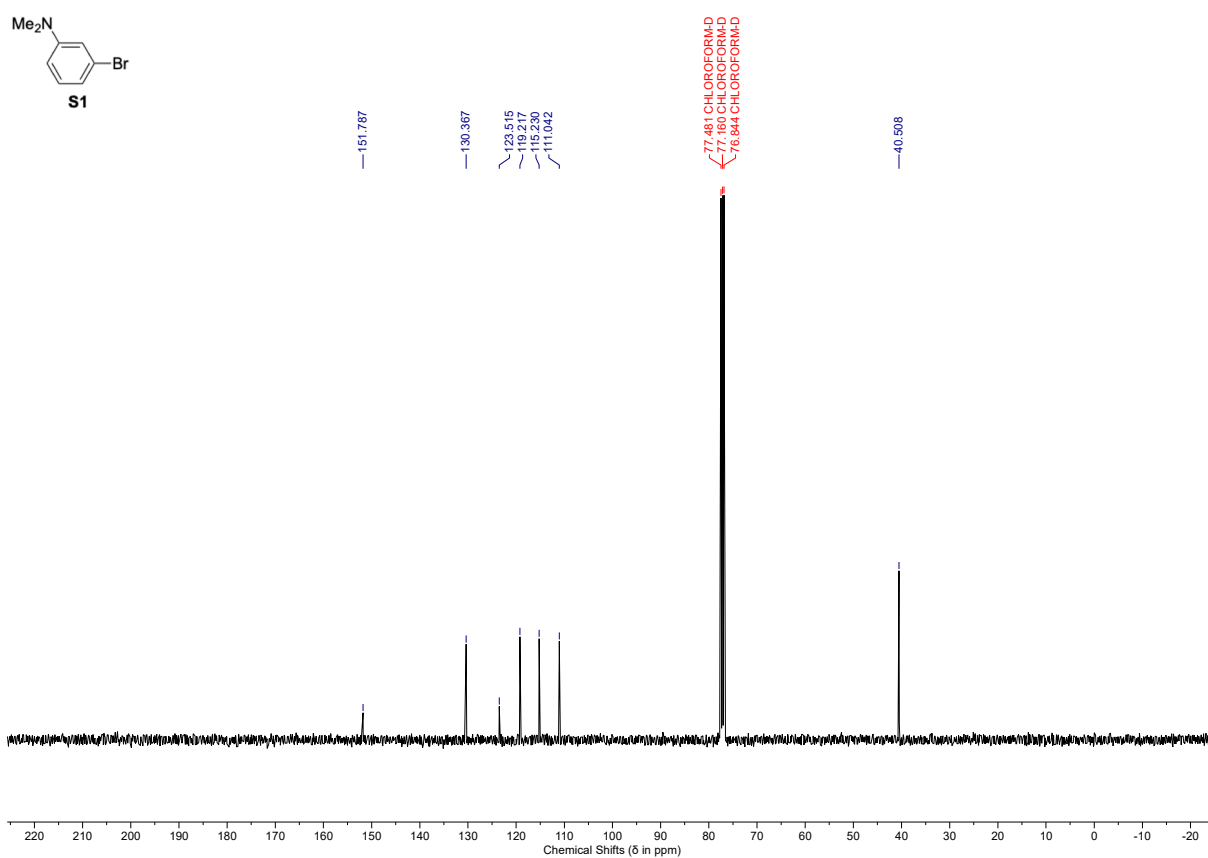

**Figure S17.**  $^{13}\text{C}$  NMR ( $\text{CDCl}_3$ , 100 MHz): 3-Bromo-*N,N*-dimethylaniline (**S1**).

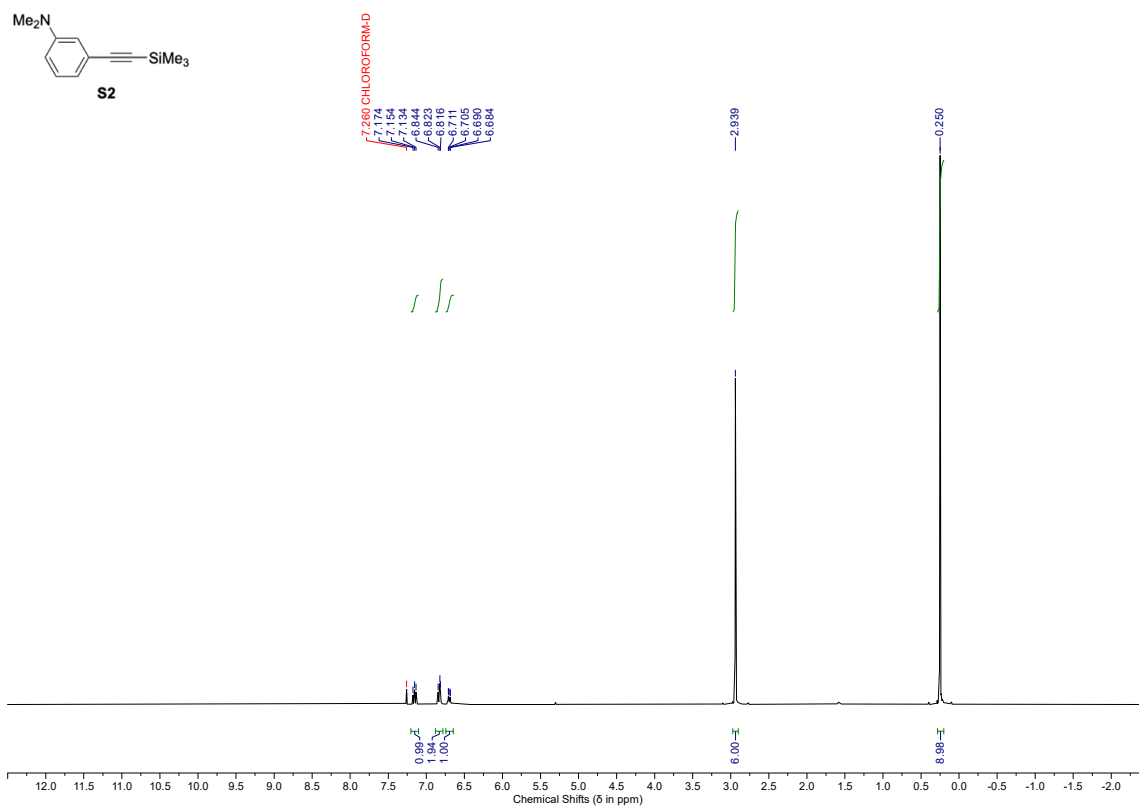

**Figure S18.**  $^1\text{H}$  NMR ( $\text{CDCl}_3$ , 400 MHz): *N,N*-Dimethyl-3-((trimethylsilyl)ethynyl)aniline (**S2**).

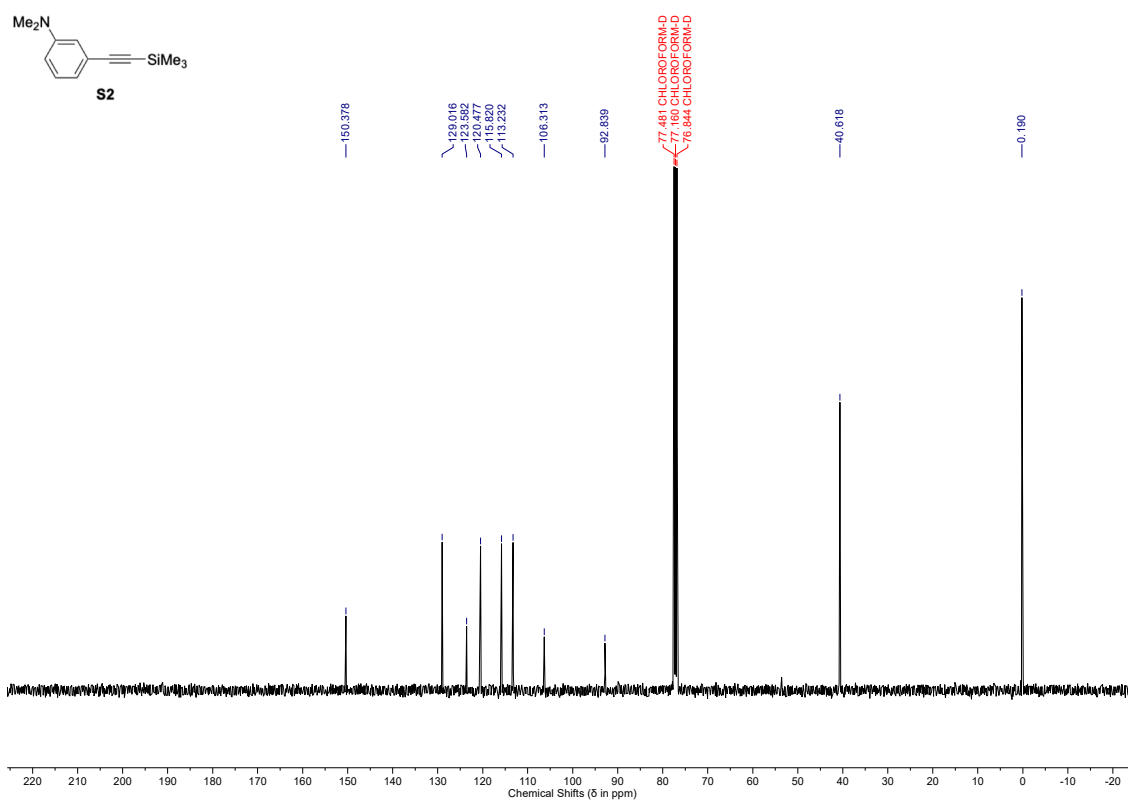

**Figure S19.**  $^{13}\text{C}$  NMR ( $\text{CDCl}_3$ , 100 MHz): *N,N*-Dimethyl-3-((trimethylsilyl)ethynyl)aniline (**S2**).

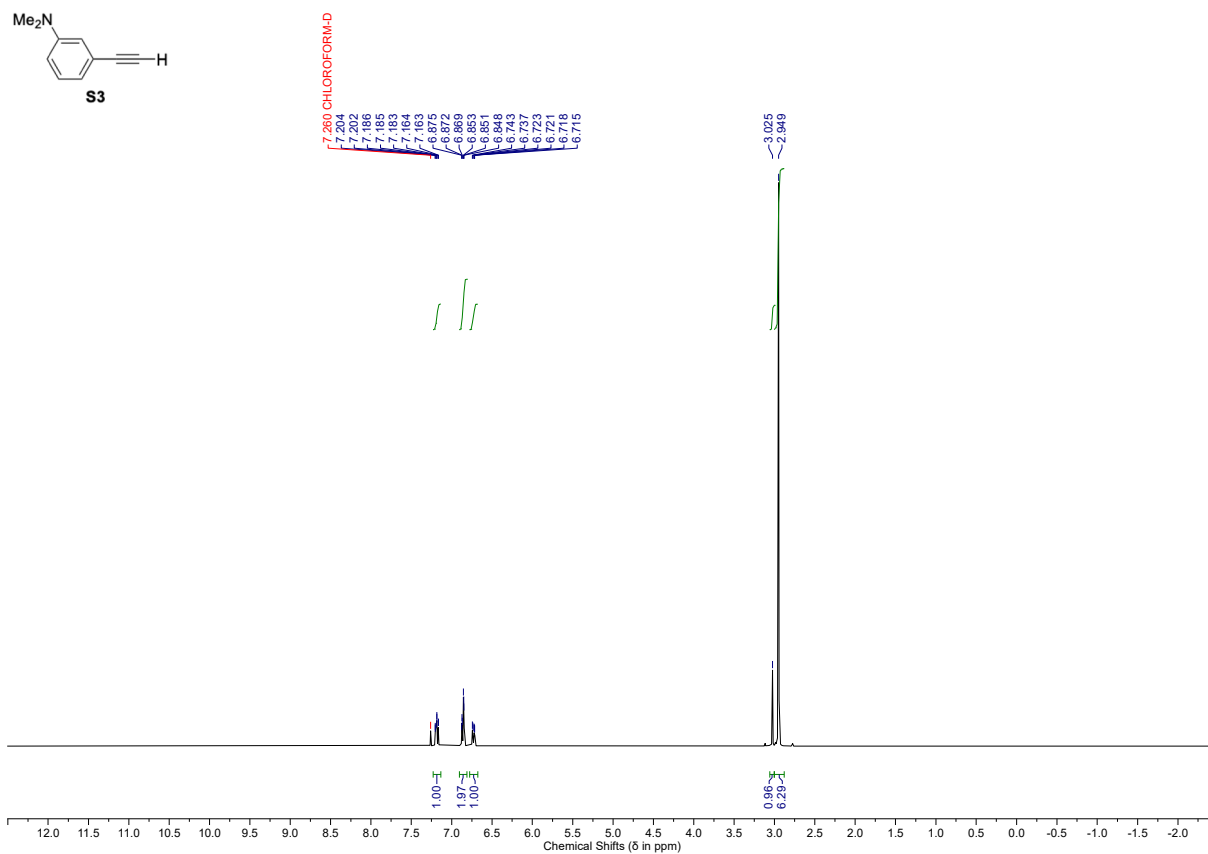

**Figure S20.** <sup>1</sup>H NMR (CDCl<sub>3</sub>, 400 MHz): 3-Ethynyl-*N,N*-dimethylaniline (S3).

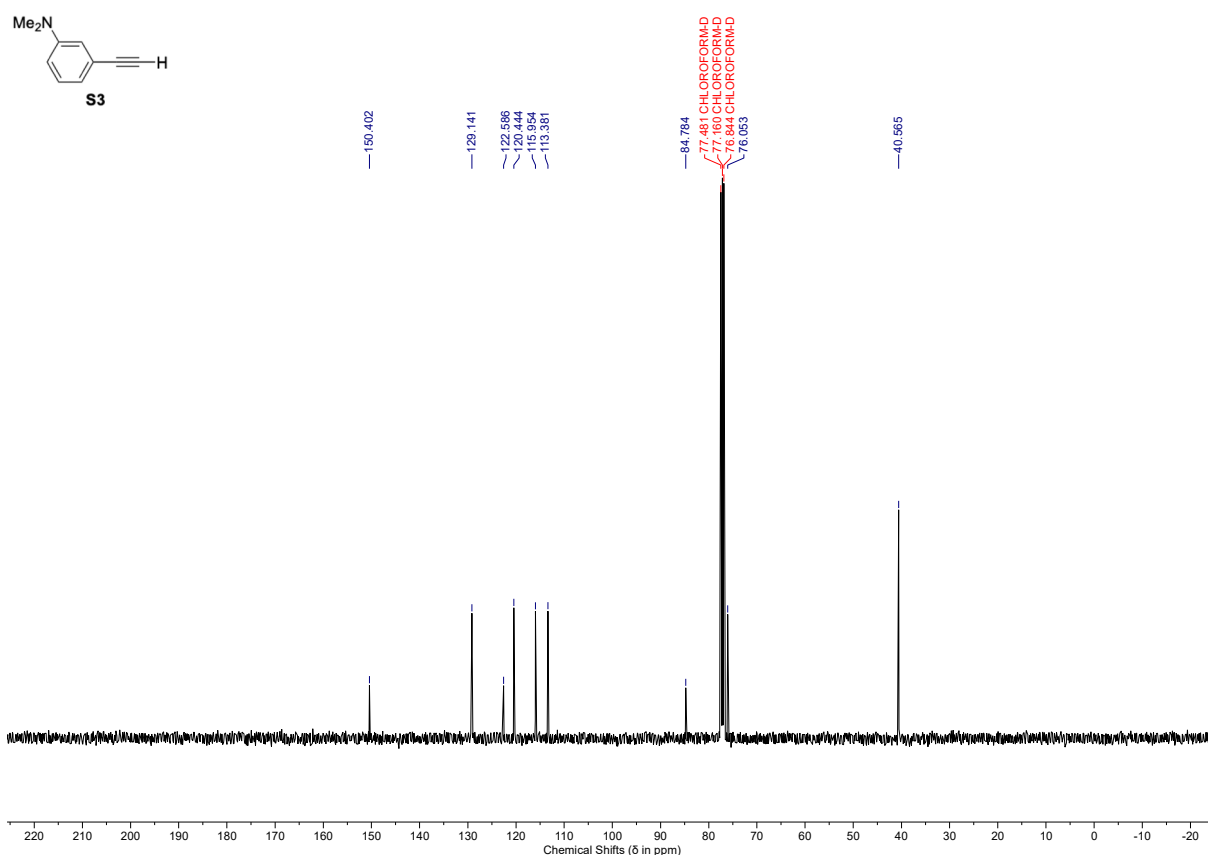

**Figure S21.** <sup>13</sup>C NMR (CDCl<sub>3</sub>, 100 MHz): 3-Ethynyl-*N,N*-dimethylaniline (S3).



## 7. Circular Dichroism Spectra

All Circular Dichroism (CD) Spectra were recorded on JASCO J-1100 Circular Dichroism Spectrophotometer. The cuvette with a thickness of 0.2 cm were used for the measurement.

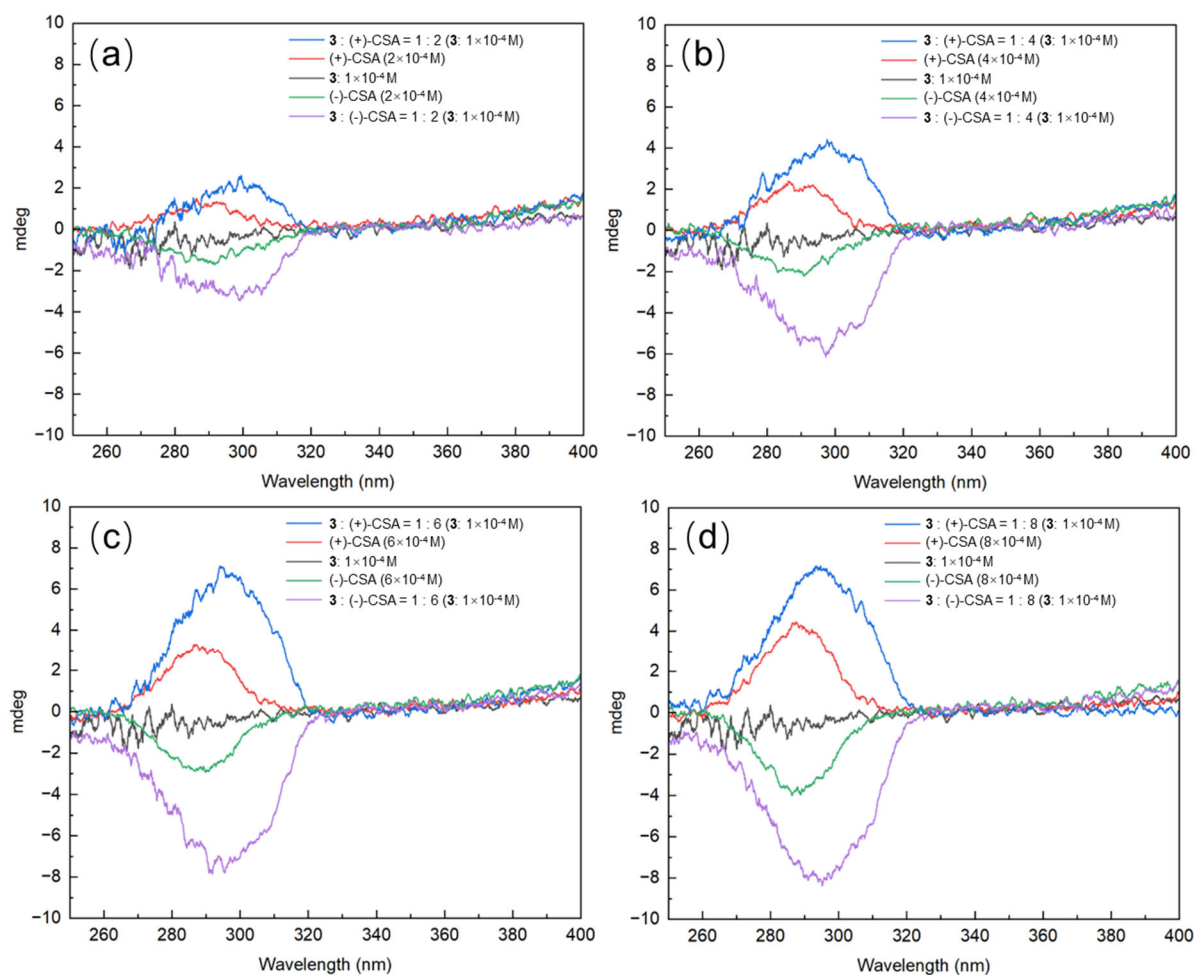

**Figure S22.** Experimental CD spectra about comparison between mixture and chiral additives (CSA) in dichloromethane: (a) 3:CSA = 1:2; (b) 3:CSA = 1:4; (c) 3:CSA = 1:6; (d) 3:CSA = 1:8. ((+)-CSA: (+)-10-Camphorsulfonic Acid; (-)-CSA: (-)-10-Camphorsulfonic Acid)

## 8. References

- [1] J. M. Tobin, T. J. D. McCabe, A. W. Prentice, S. Holzer, G. O. Lloyd, M. J. Paterson, V. Arrighi, P. A. G. Cormack and F. Vilela, *ACS Catal.*, 2017, **7**, 4602.
- [2] Z. Y. Jiang, K. Sekine and Y. Kuninobu. *Chem. Commun.*, 2022, **58**, 843.
- [3] K. Tahara, T. Fujita, M. Sonoda, M. Shiro and Y. Tobe. *J. Am. Chem. Soc.*, 2008, **130**, 14339.
- [4] J.-K. Fang, T. Sun, Y. Fang, Z. Xu, H. Zou, Y. Liu and F. Ge. *J. Chem. Res.*, 2015, **39**, 487.
- [5] G. M. Sheldrick, *Acta Cryst.*, 2015, **A71**, 3.
- [6] O. V. Dolomanov, L.J. Bourhis, R.J. Gildea, J. A. K. Howard and H. Puschmann, *J. Appl. Cryst.*, 2009, **42**, 339.
- [7] G. M. Sheldrick, *Acta Cryst.*, 2015, **C71**, 3.
- [8] L. C. Cross and W. Klyne, *Pure Appl. Chem.*, 1976, **45**, 11.
